# Supplementary material
Source: MDPI journal article supplement (https://www.mdpi.com/2075-163X/6/4/123)
Supplement: s1 [file s1]

 
data_quijarroite
 
_audit_creation_method            SHELXL-97
_chemical_name_systematic
;
 ?
;
_chemical_name_common             'quijarroite'
_chemical_melting_point           ?
_chemical_formula_moiety          
 'Bi4 Cu6 Hg Pb2 Se12'
_chemical_formula_sum
 'Bi4 Cu6 Hg Pb2 Se12' 
_chemical_formula_weight          2779.65

loop_
 _atom_type_symbol
 _atom_type_description
 _atom_type_scat_dispersion_real
 _atom_type_scat_dispersion_imag
 _atom_type_scat_source
 'Cu'  'Cu'   0.3201   1.2651
 'International Tables Vol C Tables 4.2.6.8 and 6.1.1.4'
 'Hg'  'Hg'  -2.3894   9.2266
 'International Tables Vol C Tables 4.2.6.8 and 6.1.1.4'
 'Pb'  'Pb'  -3.3944  10.1111
 'International Tables Vol C Tables 4.2.6.8 and 6.1.1.4'
 'Bi'  'Bi'  -4.1077  10.2566
 'International Tables Vol C Tables 4.2.6.8 and 6.1.1.4'
 'Se'  'Se'  -0.0929   2.2259
 'International Tables Vol C Tables 4.2.6.8 and 6.1.1.4'
 
_symmetry_cell_setting            'orthorhombic'
_space_group_IT_number            31
_symmetry_space_group_name_H-M    'P m n 21'
_space_group_name_Hall            'P 2ac -2'
 
loop_
 _space_group_symop_operation_xyz
 'x, y, z'
 '-x, y, z'
 '-x+1/2, -y, z+1/2'
 'x+1/2, -y, z+1/2'
 
_cell_length_a                    9.2413(8)
_cell_length_b                    9.0206(7)
_cell_length_c                    9.6219(8)
_cell_angle_alpha                 90
_cell_angle_beta                  90
_cell_angle_gamma                 90
_cell_volume                      802.10(11)
_cell_formula_units_Z             1
_cell_measurement_temperature     293(2)
_cell_measurement_reflns_used     412 
_cell_measurement_theta_min       8.5 
_cell_measurement_theta_max       22.9
 
_exptl_crystal_description        block 
_exptl_crystal_colour             black
_exptl_crystal_size_max           0.050 
_exptl_crystal_size_mid           0.035 
_exptl_crystal_size_min           0.030
_exptl_crystal_density_meas       ? 
_exptl_crystal_density_method     'not measured'              
_exptl_crystal_density_diffrn     5.755          
_exptl_crystal_F_000              1158
_exptl_absorpt_coefficient_mu     54.557
_exptl_absorpt_correction_type    'gaussian' 
_exptl_absorpt_correction_T_min   0.758 
_exptl_absorpt_correction_T_max   0.911 
_exptl_absorpt_process_details    
'(<i>ABSPACK</i>; Oxford Diffraction, 2006)' 
 
_exptl_special_details
;
 ?
;
 
_diffrn_ambient_temperature       293(2)
_diffrn_radiation_wavelength      0.71073
_diffrn_radiation_type            MoK\a
_diffrn_source                    'fine-focus sealed tube' 
_diffrn_radiation_monochromator   graphite
_diffrn_measurement_device_type   'Oxford Xcalibur 3'                        
_diffrn_measurement_method        '\w scans' 
_diffrn_detector_area_resol_mean  ? 
_diffrn_reflns_number             9312
_diffrn_reflns_av_unetI/netI      0.1410
_diffrn_reflns_av_R_equivalents   0.0235
_diffrn_reflns_limit_h_min        -13
_diffrn_reflns_limit_h_max        13
_diffrn_reflns_limit_k_min        -12
_diffrn_reflns_limit_k_max        12
_diffrn_reflns_limit_l_min        -13
_diffrn_reflns_limit_l_max        13
_diffrn_reflns_theta_min          3.056
_diffrn_reflns_theta_max          29.998
_reflns_number_total              2195
_reflns_number_gt                 1523
_reflns_threshold_expression      'I > 2\s(I)'

_computing_data_collection        '<i>CrysAlis</i> (Oxford Diffraction 2006)'
_computing_cell_refinement        '<i>CrysAlis</i> (Oxford Diffraction 2006)'
_computing_data_reduction         '<i>CrysAlis</i> (Oxford Diffraction 2006)'
_computing_structure_solution     'SHELXS-97 (Sheldrick, 2008)'
_computing_structure_refinement   'SHELXL-97 (Sheldrick, 2008)'
_computing_molecular_graphics     'Diamond (Brandenburg, 2001)'
_computing_publication_material   'SHELXL-97 (Sheldrick, 2008)'
 
_refine_special_details
;
 Refinement of F^2^ against ALL reflections.  The weighted R-factor wR and
 goodness of fit S are based on F^2^, conventional R-factors R are based
 on F, with F set to zero for negative F^2^. The threshold expression of
 F^2^ > 2sigma(F^2^) is used only for calculating R-factors(gt) etc. and is
 not relevant to the choice of reflections for refinement.  R-factors based
 on F^2^ are statistically about twice as large as those based on F, and R-
 factors based on ALL data will be even larger.
;

_refine_ls_structure_factor_coef  Fsqd
_refine_ls_matrix_type            full
_refine_ls_weighting_scheme       calc
_refine_ls_weighting_details
'w=1/[\s^2^(Fo^2^)+(0.1307P)^2^] where P=(Fo^2^+2Fc^2^)/3'
_atom_sites_solution_primary      'known structure'
_atom_sites_solution_secondary    'known structure'
_atom_sites_solution_hydrogens    .
_refine_ls_hydrogen_treatment     undef
_refine_ls_extinction_method      none
_refine_ls_extinction_coef        .
_refine_ls_abs_structure_details
;
 Flack x determined using 559 quotients [(I+)-(I-)]/[(I+)+(I-)]
 (Parsons and Flack (2004), Acta Cryst. A60, s61).
;
_refine_ls_abs_structure_Flack    -0.002(14)
_chemical_absolute_configuration  ?
_refine_ls_number_reflns          2195
_refine_ls_number_parameters      69
_refine_ls_number_restraints      1
_refine_ls_R_factor_all           0.0282
_refine_ls_R_factor_gt            0.0276
_refine_ls_wR_factor_ref          0.0985
_refine_ls_wR_factor_gt           0.0976
_refine_ls_goodness_of_fit_ref    1.040
_refine_ls_restrained_S_all       1.040
_refine_ls_shift/su_max           0.000
_refine_ls_shift/su_mean          0.000
 
loop_
 _atom_site_label
 _atom_site_type_symbol
 _atom_site_fract_x
 _atom_site_fract_y
 _atom_site_fract_z
 _atom_site_U_iso_or_equiv
 _atom_site_adp_type
 _atom_site_occupancy
 _atom_site_site_symmetry_order  
 _atom_site_calc_flag
 _atom_site_refinement_flags_posn
 _atom_site_refinement_flags_adp
 _atom_site_refinement_flags_occupancy
 _atom_site_disorder_assembly
 _atom_site_disorder_group
Cu Cu 0.2311(3) 0.2658(4) 0.8228(4) 0.0381(11) Uani 0.747(14) 1 d . . P . .
Hg Hg 0.2311(3) 0.2658(4) 0.8228(4) 0.0381(11) Uani 0.253(14) 1 d . . P . .
Pb Pb 0.5000 0.4971(3) 0.1768(2) 0.0424(6) Uani 1 2 d S T P . .
Bi1 Bi 0.5000 0.0703(2) 0.0560(3) 0.0410(5) Uani 1 2 d S T P . .
Bi2 Bi 0.0000 0.5064(2) 0.1495(2) 0.0369(5) Uani 1 2 d S T P . .
Cu2 Cu 0.2437(6) 0.2757(9) 0.4230(11) 0.043(2) Uani 0.75(2) 1 d . . P . .
Se1 Se 0.0000 0.2400(6) 0.2794(6) 0.0342(11) Uani 1 2 d S T P . .
Se2 Se 0.5000 0.2319(6) 0.2990(6) 0.0340(11) Uani 1 2 d S T P . .
Se3 Se 0.2373(4) 0.0861(5) 0.6428(5) 0.0362(8) Uani 1 1 d . . . . .
Se4 Se 0.2685(4) 0.5532(5) 0.4925(5) 0.0374(8) Uani 1 1 d . . . . .
 
loop_
 _atom_site_aniso_label
 _atom_site_aniso_U_11
 _atom_site_aniso_U_22
 _atom_site_aniso_U_33
 _atom_site_aniso_U_23
 _atom_site_aniso_U_13
 _atom_site_aniso_U_12
Cu 0.0366(17) 0.0386(19) 0.0390(19) 0.0005(13) -0.0001(13) 0.0002(11)
Hg 0.0366(17) 0.0386(19) 0.0390(19) 0.0005(13) -0.0001(13) 0.0002(11)
Pb 0.0394(11) 0.0441(11) 0.0435(14) 0.0005(8) 0.000 0.000
Bi1 0.0385(11) 0.0418(10) 0.0427(9) 0.0001(9) 0.000 0.000
Bi2 0.0345(10) 0.0381(10) 0.0382(11) 0.0002(7) 0.000 0.000
Cu2 0.041(4) 0.043(4) 0.045(5) -0.003(4) 0.000(2) -0.001(2)
Se1 0.032(3) 0.035(3) 0.036(2) -0.0002(19) 0.000 0.000
Se2 0.032(2) 0.035(2) 0.035(3) -0.0001(19) 0.000 0.000
Se3 0.0337(18) 0.0373(19) 0.038(2) -0.0003(15) 0.0006(14) -0.0013(12)
Se4 0.0344(18) 0.039(2) 0.0383(19) 0.0005(17) 0.0004(16) 0.0006(14)
 
_geom_special_details
;
 All esds (except the esd in the dihedral angle between two l.s. planes)
 are estimated using the full covariance matrix.  The cell esds are taken
 into account individually in the estimation of esds in distances, angles
 and torsion angles; correlations between esds in cell parameters are only
 used when they are defined by crystal symmetry.  An approximate (isotropic)
 treatment of cell esds is used for estimating esds involving l.s. planes.
;
 
loop_
 _geom_bond_atom_site_label_1
 _geom_bond_atom_site_label_2
 _geom_bond_distance
 _geom_bond_site_symmetry_2
 _geom_bond_publ_flag
Cu Se4 2.309(6) 3_565 ?
Cu Se3 2.373(6) . ?
Cu Pb 3.333(4) 3_565 ?
Pb Se2 2.665(6) . ?
Pb Se4 3.083(4) 3_564 ?
Pb Se4 3.083(4) 4_564 ?
Pb Cu 3.333(4) 4_564 ?
Pb Hg 3.333(4) 4_564 ?
Pb Hg 3.333(4) 3_564 ?
Pb Cu 3.333(4) 3_564 ?
Bi1 Se3 2.738(4) 3_554 ?
Bi1 Se3 2.738(4) 4_554 ?
Bi1 Se2 2.755(6) . ?
Bi2 Se4 2.673(4) 4_464 ?
Bi2 Se4 2.673(4) 3_564 ?
Bi2 Se1 2.708(6) . ?
Cu2 Se4 2.601(9) . ?
Cu2 Se1 2.662(7) . ?
Cu2 Se2 2.681(7) . ?
Cu2 Se3 2.720(11) . ?
Se1 Cu2 2.662(7) 2 ?
Se2 Cu2 2.681(7) 2_655 ?
Se3 Bi1 2.738(4) 3 ?
Se4 Hg 2.309(6) 3_564 ?
Se4 Cu 2.309(6) 3_564 ?
Se4 Bi2 2.673(4) 3_565 ?
Se4 Pb 3.083(4) 3_565 ?
 
loop_
 _geom_angle_atom_site_label_1
 _geom_angle_atom_site_label_2
 _geom_angle_atom_site_label_3
 _geom_angle
 _geom_angle_site_symmetry_1
 _geom_angle_site_symmetry_3
 _geom_angle_publ_flag
Se4 Cu Se3 177.6(2) 3_565 . ?
Se4 Cu Pb 81.10(15) 3_565 3_565 ?
Se3 Cu Pb 98.39(16) . 3_565 ?
Se2 Pb Se4 96.99(13) . 3_564 ?
Se2 Pb Se4 96.99(13) . 4_564 ?
Se4 Pb Se4 107.18(18) 3_564 4_564 ?
Se2 Pb Cu 112.95(13) . 4_564 ?
Se4 Pb Cu 148.48(14) 3_564 4_564 ?
Se4 Pb Cu 79.69(11) 4_564 4_564 ?
Se2 Pb Hg 112.95(13) . 4_564 ?
Se4 Pb Hg 148.48(14) 3_564 4_564 ?
Se4 Pb Hg 79.69(11) 4_564 4_564 ?
Cu Pb Hg 0.00(16) 4_564 4_564 ?
Se2 Pb Hg 112.95(13) . 3_564 ?
Se4 Pb Hg 79.69(11) 3_564 3_564 ?
Se4 Pb Hg 148.48(14) 4_564 3_564 ?
Cu Pb Hg 79.70(13) 4_564 3_564 ?
Hg Pb Hg 79.70(13) 4_564 3_564 ?
Se2 Pb Cu 112.95(13) . 3_564 ?
Se4 Pb Cu 79.69(11) 3_564 3_564 ?
Se4 Pb Cu 148.48(14) 4_564 3_564 ?
Cu Pb Cu 79.70(13) 4_564 3_564 ?
Hg Pb Cu 79.70(13) 4_564 3_564 ?
Hg Pb Cu 0.00(8) 3_564 3_564 ?
Se3 Bi1 Se3 106.43(19) 3_554 4_554 ?
Se3 Bi1 Se2 90.81(13) 3_554 . ?
Se3 Bi1 Se2 90.81(13) 4_554 . ?
Se4 Bi2 Se4 106.3(2) 4_464 3_564 ?
Se4 Bi2 Se1 94.73(14) 4_464 . ?
Se4 Bi2 Se1 94.73(14) 3_564 . ?
Se4 Cu2 Se1 108.9(3) . . ?
Se4 Cu2 Se2 100.3(3) . . ?
Se1 Cu2 Se2 119.9(4) . . ?
Se4 Cu2 Se3 114.0(4) . . ?
Se1 Cu2 Se3 108.0(3) . . ?
Se2 Cu2 Se3 105.8(3) . . ?
Cu2 Se1 Cu2 115.6(4) 2 . ?
Cu2 Se1 Bi2 97.6(2) 2 . ?
Cu2 Se1 Bi2 97.6(2) . . ?
Pb Se2 Cu2 93.7(2) . 2_655 ?
Pb Se2 Cu2 93.7(2) . . ?
Cu2 Se2 Cu2 124.1(4) 2_655 . ?
Pb Se2 Bi1 95.77(19) . . ?
Cu2 Se2 Bi1 117.1(2) 2_655 . ?
Cu2 Se2 Bi1 117.1(2) . . ?
Cu Se3 Cu2 98.0(3) . . ?
Cu Se3 Bi1 123.72(18) . 3 ?
Cu2 Se3 Bi1 96.0(2) . 3 ?
Hg Se4 Cu 0.0(2) 3_564 3_564 ?
Hg Se4 Cu2 119.9(3) 3_564 . ?
Cu Se4 Cu2 119.9(3) 3_564 . ?
Hg Se4 Bi2 122.73(19) 3_564 3_565 ?
Cu Se4 Bi2 122.73(19) 3_564 3_565 ?
Cu2 Se4 Bi2 91.3(2) . 3_565 ?
Hg Se4 Pb 120.77(16) 3_564 3_565 ?
Cu Se4 Pb 120.77(16) 3_564 3_565 ?
Cu2 Se4 Pb 86.3(2) . 3_565 ?
Bi2 Se4 Pb 106.82(17) 3_565 3_565 ?

_diffrn_measured_fraction_theta_max    0.995
_diffrn_reflns_theta_full              60.25
_diffrn_measured_fraction_theta_full   0.995
_refine_diff_density_max    0.421
_refine_diff_density_min   -0.761
_refine_diff_density_rms    0.032

#=======================================================================

# STRUCTURE-FACTOR LIST

loop_
 _refln_index_h
 _refln_index_k
 _refln_index_l
 _refln_F_squared_calc
 _refln_F_squared_meas
 _refln_F_squared_sigma
 _refln_observed_status
   1   0 -13        293.99        285.02        44.64 o
   3   0 -13        188.69        187.15        80.70 o
   0   1 -13       1089.06       1023.32      3578.20 o
   1   1 -13       1994.82       1897.27        84.13 o
   2   1 -13        127.38        116.75       410.36 o
   3   1 -13       1067.00       1038.78       108.17 o
   0   2 -13        146.44        144.23      1129.78 o
   1   2 -13       1261.65       1203.61       245.53 o
   2   2 -13        998.76        987.27        53.23 o
   0   3 -13        250.93        235.23       558.02 o
   1   3 -13        845.48        805.27       121.91 o
   0   0 -12       5394.26       4943.20      7123.77 o
   2   0 -12       1508.07       1522.97     20493.93 o
   6   0 -12        484.17        515.10     10844.48 o
   0   1 -12       3040.24       2949.78       140.79 o
   1   1 -12        429.45        413.79       212.91 o
   2   1 -12        155.05        152.81       590.64 o
   3   1 -12        726.05        710.83       326.23 o
   4   1 -12       1973.16       2031.19       182.00 o
   5   1 -12        244.64        247.25       456.72 o
   0   2 -12       1035.93        999.29       932.32 o
   1   2 -12        269.60        262.70        94.43 o
   2   2 -12       1693.41       1687.80       765.78 o
   3   2 -12        407.56        396.62        92.72 o
   4   2 -12        778.08        781.23       470.45 o
   5   2 -12         93.52         96.15       161.40 o
   1   3 -12         75.28         75.55        96.15 o
   2   3 -12        326.19        314.21       480.76 o
   3   3 -12        129.24        132.21        63.53 o
   4   3 -12        281.78        285.02      3464.88 o
   5   3 -12         14.09         13.74        78.98 o
   0   4 -12        918.27        887.68       769.21 o
   1   4 -12        137.97        132.21       130.49 o
   2   4 -12        149.15        145.94        94.43 o
   3   4 -12        215.90        214.62       195.74 o
   4   4 -12        558.93        576.91       262.70 o
   1   5 -12        474.60        444.70        82.42 o
   2   5 -12         82.19         85.85       135.64 o
   3   5 -12        718.82        697.10        97.87 o
   1   0 -11          8.91          6.87        56.66 o
   3   0 -11        809.06        757.19       221.49 o
   5   0 -11        334.88        336.53       271.28 o
   7   0 -11       1054.50       1011.30       370.87 o
   0   1 -11       1645.22       1547.00       530.55 o
   1   1 -11       5182.93       4982.69        27.47 o
   2   1 -11       1474.77       1352.98       877.38 o
   3   1 -11       4517.27       4457.29       442.98 o
   4   1 -11        928.09        937.47       417.23 o
   5   1 -11       3015.83       3033.91       266.13 o
   6   1 -11        477.14        461.87       631.85 o
   7   1 -11       1953.88       1933.33       405.21 o
   0   2 -11        287.17        279.87       358.85 o
   1   2 -11       1999.39       1911.00       140.79 o
   2   2 -11       1094.05       1083.42       810.42 o
   3   2 -11       1646.79       1653.46       317.64 o
   4   2 -11        173.65        176.85       194.02 o
   5   2 -11       1227.79       1208.76       173.42 o
   6   2 -11        522.60        533.98       451.57 o
   7   2 -11        705.72        734.87       303.91 o
   1   3 -11       2176.48       2079.27       109.89 o
   2   3 -11       2228.62       2297.33     10538.85 o
   3   3 -11       1906.41       1854.34        87.57 o
   4   3 -11        530.41        518.53      3358.42 o
   5   3 -11       1251.12       1258.55        77.26 o
   6   3 -11       1133.19       1201.89      6016.31 o
   0   4 -11        447.94        432.68       194.02 o
   1   4 -11       1101.55       1042.21       163.11 o
   2   4 -11       1880.25       1828.59       903.13 o
   3   4 -11       1326.53       1286.02       161.40 o
   4   4 -11        322.02        327.94       104.74 o
   5   4 -11        458.08        449.85        85.85 o
   6   4 -11        858.83        863.64       575.19 o
   0   5 -11       1154.82       1100.59       151.09 o
   2   5 -11       1437.12       1330.66       159.68 o
   3   5 -11        947.06        922.02       377.74 o
   4   5 -11        641.49        655.89       106.45 o
   5   5 -11        226.67        226.64       319.36 o
   0   6 -11        957.53        894.55       621.55 o
   1   6 -11       3115.52       2982.40       133.92 o
   2   6 -11        133.57        140.79       103.02 o
   3   6 -11       1498.99       1505.80       133.92 o
   4   6 -11        574.64        570.04       418.94 o
   0   7 -11        312.36        276.43       103.02 o
   1   7 -11        100.03         94.43        66.96 o
   2   7 -11        100.70         80.70       243.81 o
   0   0 -10       2262.94       2158.25      2908.57 o
   2   0 -10      14062.80      14093.01     14034.63 o
   6   0 -10       5728.67       6069.54     27624.57 o
   8   0 -10        869.74        837.89      1411.36 o
   0   1 -10       3103.22       3042.50       202.60 o
   1   1 -10         48.12         53.23       224.93 o
   2   1 -10       3106.02       3051.08       590.64 o
   3   1 -10        474.39        468.74       121.91 o
   4   1 -10       1807.73       1878.38       192.30 o
   5   1 -10        140.80        127.06       152.81 o
   6   1 -10       1181.47       1213.91       575.19 o
   7   1 -10        541.92        535.70       319.36 o
   0   2 -10      11147.77      10370.59      3561.03 o
   1   2 -10        279.49        278.15       245.53 o
   2   2 -10       6570.74       6358.00      1067.96 o
   3   2 -10        787.39        794.96       504.79 o
   4   2 -10       7293.80       7171.85      1121.19 o
   5   2 -10         47.06         44.64       121.91 o
   6   2 -10       2902.09       2925.74       607.81 o
   7   2 -10        639.95        661.04       298.76 o
   8   2 -10       2238.68       2178.85       386.32 o
   1   3 -10       2268.45       2147.95        96.15 o
   2   3 -10        904.63        918.59      1732.44 o
   3   3 -10       2672.25       2611.53       161.40 o
   4   3 -10       1703.24       1744.46       221.49 o
   5   3 -10       1084.04       1067.96        54.94 o
   6   3 -10        430.50        451.57       813.85 o
   7   3 -10       1514.53       1528.12       137.36 o
   8   3 -10        493.45        501.36       285.02 o
   1   4 -10        712.99        691.94        99.59 o
   2   4 -10       4686.24       4732.01        96.15 o
   3   4 -10       1198.80       1210.47        94.43 o
   4   4 -10        136.28        154.53       144.23 o
   5   4 -10        449.56        446.42       121.91 o
   6   4 -10       1892.78       2015.74       115.04 o
   7   4 -10        925.06        958.08       169.98 o
   0   5 -10       4734.50       4464.16        99.59 o
   1   5 -10        459.50        429.25       188.87 o
   2   5 -10       3511.79       3449.42       218.06 o
   3   5 -10        217.12        218.06       264.42 o
   4   5 -10       3230.97       3221.06       137.36 o
   5   5 -10        527.40        503.08       236.94 o
   6   5 -10       1583.12       1620.83       178.57 o
   7   5 -10        114.75        121.91       326.23 o
   0   6 -10       1158.06       1085.13        92.72 o
   1   6 -10         20.32         17.17       132.21 o
   2   6 -10       1085.57       1004.44      7644.02 o
   3   6 -10         12.55         15.45       113.32 o
   4   6 -10        693.19        697.10        92.72 o
   5   6 -10         89.62         89.28       200.89 o
   6   6 -10        479.04        467.02      3260.55 o
   0   7 -10       4373.50       4151.67       113.32 o
   1   7 -10        203.53        180.28        63.53 o
   2   7 -10        299.85        321.08      1907.57 o
   3   7 -10        291.92        279.87        85.85 o
   4   7 -10       2898.13       2906.86        99.59 o
   5   7 -10        226.67        216.34       128.77 o
   0   8 -10          2.14          1.72       195.74 o
   1   8 -10         45.31         41.21       223.21 o
   2   8 -10        929.33        944.34       413.79 o
   3   8 -10         82.15         77.26       307.34 o
   5   0  -9       3961.73       3940.48       264.42 o
   7   0  -9       3556.41       3497.50       379.45 o
   9   0  -9        978.67        911.72       274.72 o
   0   1  -9       5046.48       4927.75       338.25 o
   1   1  -9       4711.66       4562.03       176.85 o
   2   1  -9        959.11        958.08      2300.76 o
   3   1  -9       3980.21       3943.91       103.02 o
   4   1  -9       3259.21       3375.59       142.51 o
   5   1  -9       2839.67       2879.38       145.94 o
   6   1  -9        611.16        621.55      1696.38 o
   8   1  -9        956.67        992.42       297.04 o
   9   1  -9        933.75        897.98       252.40 o
   0   2  -9       2532.92       2462.16        75.55 o
   1   2  -9       5214.98       5071.97       267.85 o
   2   2  -9       1327.12       1311.78        32.62 o
   3   2  -9       3643.92       3609.10       187.15 o
   4   2  -9       1618.59       1668.91        70.40 o
   5   2  -9       4525.07       4625.56       113.32 o
   6   2  -9        657.62        671.34        78.98 o
   7   2  -9       1852.39       1868.08       238.66 o
   8   2  -9        446.90        461.87       247.25 o
   9   2  -9       1768.63       1732.44       182.00 o
   0   3  -9       3459.50       3337.82      4067.54 o
   1   3  -9       3756.15       3609.10        58.38 o
   2   3  -9       8980.36       8698.25      3348.12 o
   3   3  -9       3748.74       3679.50       142.51 o
   4   3  -9       1761.07       1823.44      1334.10 o
   5   3  -9       1940.16       1962.51        54.94 o
   6   3  -9       2992.74       3037.35      1981.40 o
   7   3  -9       1851.71       1854.34       168.26 o
   8   3  -9        185.59        206.04       904.85 o
   9   3  -9        555.58        532.27       195.74 o
   0   4  -9       3741.44       3494.06      2197.74 o
   1   4  -9       4551.54       4328.52        89.28 o
   2   4  -9        844.97        861.93       698.81 o
   3   4  -9       2546.12       2549.72       118.47 o
   4   4  -9       2232.05       2209.76       928.89 o
   5   4  -9       3755.51      13986.56        96.15 o
   6   4  -9        473.51        497.93       430.96 o
   7   4  -9        751.95        784.66       182.00 o
   8   4  -9        486.79        482.47       475.60 o
   0   5  -9       2349.05       2329.95       367.43 o
   1   5  -9       2243.36       2178.85       255.83 o
   2   5  -9       2406.37       2338.53        78.98 o
   3   5  -9       2466.65      16137.94       175.13 o
   4   5  -9       1635.96       1706.68       355.42 o
   5   5  -9        946.80        990.70       267.85 o
   6   5  -9       1150.40       1148.66        77.26 o
   7   5  -9       1249.84       1229.36       116.75 o
   8   5  -9        579.26        594.08       334.81 o
   1   6  -9       1196.83       1167.55        91.00 o
   2   6  -9        243.68        199.17      5944.20 o
   3   6  -9        867.80        829.30        73.83 o
   4   6  -9        743.79        774.36       149.38 o
   5   6  -9        837.33        882.53       194.02 o
   6   6  -9        128.74        113.32      2355.70 o
   7   6  -9        320.72        300.47       128.77 o
   0   7  -9       1263.52       1275.72       494.49 o
   1   7  -9       2267.31       2146.23        92.72 o
   2   7  -9         97.21        103.02      8095.58 o
   3   7  -9       2201.22       2196.02        94.43 o
   4   7  -9        749.08        808.70       230.08 o
   5   7  -9       1152.32       1167.55       133.92 o
   6   7  -9          7.97         12.02      2778.08 o
   0   8  -9       1153.88       1057.66      1711.83 o
   1   8  -9       1667.94       1571.04       135.64 o
   2   8  -9        976.79        980.40       298.76 o
   3   8  -9        699.86        686.79       108.17 o
   4   8  -9        722.64        702.25       903.13 o
   5   8  -9       1701.66       1739.31       133.92 o
   0   9  -9         52.59         49.79      4884.82 o
   1   9  -9        515.55        492.77       145.94 o
   2   9  -9        976.90        968.38      2669.91 o
   3   9  -9        625.46        635.28       161.40 o
   0   0  -8      33584.28      32198.62      1313.49 o
   2   0  -8      26071.25      25861.23      3440.84 o
   4   0  -8      23002.77      23270.30       932.32 o
   6   0  -8      11556.81      11909.01      1473.17 o
   8   0  -8       8006.82       8006.30       822.44 o
  10   0  -8       2558.94       2429.53       417.23 o
   0   1  -8       1565.73       1413.08      3473.46 o
   1   1  -8       1530.09       1478.32        51.51 o
   2   1  -8      11447.22      11186.16      4400.63 o
   4   1  -8       1056.02       1001.00      2080.99 o
   5   1  -8        432.42        437.83        73.83 o
   6   1  -8       4867.69       4927.75      2601.23 o
   7   1  -8       1320.90       1303.19       245.53 o
   8   1  -8        394.08        370.87      1025.04 o
   9   1  -8         76.94         70.40       185.43 o
  10   1  -8       1021.03        947.78       728.00 o
   1   2  -8       1905.33       1835.46       151.09 o
   2   2  -8      20670.35      20517.97      1205.32 o
   3   2  -8       1840.32       1861.21        87.57 o
   4   2  -8       6636.58       6560.60      4877.95 o
   5   2  -8       1128.50       1116.04       140.79 o
   6   2  -8       7157.78       7465.45       576.91 o
   7   2  -8        923.48        964.95       211.19 o
   8   2  -8       1423.08       1413.08      3209.04 o
   9   2  -8        395.11        369.15       218.06 o
  10   2  -8        999.60        971.81       329.66 o
   0   3  -8       6603.33       6316.79        54.94 o
   1   3  -8       2432.47       2366.01        53.23 o
   2   3  -8       9664.72       9573.91       703.96 o
   3   3  -8       1749.70       1739.31       145.94 o
   4   3  -8       4383.85       4443.56        65.25 o
   5   3  -8       3783.19       3768.78        63.53 o
   6   3  -8       4148.18       4261.56       341.68 o
   7   3  -8       1780.24       1799.40       154.53 o
   8   3  -8       1418.51       1435.40       255.83 o
   9   3  -8       1920.95       1823.44       185.43 o
  10   3  -8        904.29        849.91       305.62 o
   0   4  -8      10233.49       9690.66      4560.31 o
   1   4  -8        900.83        863.64        65.25 o
   2   4  -8      15766.77      15257.13      5758.77 o
   3   4  -8       2055.72       2039.78       163.11 o
   4   4  -8       6753.12       6797.54      3456.29 o
   5   4  -8        103.84         99.59        68.68 o
   6   4  -8       6674.20       6792.39      2929.18 o
   7   4  -8       1430.06       1462.87       151.09 o
   8   4  -8       2198.77       2214.91      2135.93 o
   9   4  -8         30.18         29.19       199.17 o
   0   5  -8       8664.68       8372.02       224.93 o
   1   5  -8       2079.59       1974.53        85.85 o
   2   5  -8       1562.14       1538.42        72.11 o
   3   5  -8       1469.74       1389.04       132.21 o
   4   5  -8       5770.18       5877.24       130.49 o
   5   5  -8       1428.26       1435.40       132.21 o
   6   5  -8        839.06        855.06        96.15 o
   7   5  -8        530.30        497.93       109.89 o
   8   5  -8       1821.07       1828.59       207.76 o
   9   5  -8        472.38        455.00       219.77 o
   0   6  -8        888.79        681.64      1311.78 o
   1   6  -8        555.54        513.38       120.19 o
   2   6  -8       1191.79       1200.17       140.79 o
   3   6  -8        536.67        508.23        97.87 o
   4   6  -8        580.38        472.17       679.93 o
   5   6  -8        322.19        321.08       190.59 o
   6   6  -8        674.07        688.51       236.94 o
   7   6  -8        269.21        262.70       121.91 o
   8   6  -8        178.74        144.23       640.44 o
   0   7  -8       8878.02       8488.77       570.04 o
   1   7  -8        324.32        302.19       199.17 o
   2   7  -8       5682.53       5669.48      3198.74 o
   3   7  -8        479.93        477.32       111.60 o
   4   7  -8       5978.18       6019.75       348.55 o
   5   7  -8        264.67        273.00       336.53 o
   6   7  -8       2817.66       2870.80      1325.51 o
   7   7  -8        369.20        379.45       145.94 o
   0   8  -8       2108.33       2065.53       206.04 o
   1   8  -8        495.76        467.02        87.57 o
   2   8  -8       4079.23       3971.39       173.42 o
   4   8  -8       1353.24       1407.93       161.40 o
   5   8  -8        674.12        688.51       137.36 o
   6   8  -8       1732.88       1729.00       127.06 o
   0   9  -8       2992.38       2879.38      1943.63 o
   1   9  -8        138.17        125.34       199.17 o
   2   9  -8       1030.75        980.40       903.13 o
   3   9  -8         48.15         54.94       269.57 o
   4   9  -8       1878.77       1972.82      1253.40 o
   5   9  -8        248.30        231.79       139.08 o
   0  10  -8        874.61        793.25       521.96 o
   1  10  -8        234.61        216.34       118.47 o
   2  10  -8          1.58          0.00      1279.15 o
   1   0  -7      31933.57      31003.60        46.36 o
   5   0  -7      25190.86      34219.51       346.83 o
   7   0  -7       3858.99       3822.01       552.87 o
   9   0  -7       8411.89       8145.38       492.77 o
   0   1  -7       5604.54       5490.92     21941.35 o
   1   1  -7        748.37        714.27        54.94 o
   2   1  -7      10871.40      10672.78      1045.64 o
   3   1  -7        141.77        140.79        77.26 o
   4   1  -7       2905.01       3052.80     10700.25 o
   5   1  -7       2460.16       2477.61       130.49 o
   6   1  -7       3438.20       3555.88       223.21 o
   7   1  -7        651.42        652.45       204.32 o
   8   1  -7        486.37        527.11      5138.94 o
   9   1  -7       1471.34       1416.51       236.94 o
  10   1  -7        397.49        386.32       195.74 o
  11   1  -7        257.87        238.66       348.55 o
   0   2  -7      16998.20      16155.11     14068.98 o
   2   2  -7       3933.80       3976.54      1716.98 o
   3   2  -7       9626.24       9465.74        63.53 o
   4   2  -7       9995.42      10070.12      5745.03 o
   5   2  -7       4610.55       4575.77       111.60 o
   6   2  -7       1268.29       1363.29       679.93 o
   7   2  -7       4437.23       4476.18       173.42 o
   8   2  -7       2192.88       2214.91      2893.12 o
   9   2  -7       1268.20       1162.40       183.72 o
  10   2  -7        157.74        159.68       408.64 o
   0   3  -7      25368.55      24527.13       168.26 o
   1   3  -7       3330.05       3253.69       206.04 o
   2   3  -7       3062.59       2987.55       594.08 o
   3   3  -7       2613.19       2561.74       166.55 o
   4   3  -7      16203.83      16608.39        46.36 o
   5   3  -7       2021.88       2117.04       123.62 o
   6   3  -7       1323.08       1340.97       242.09 o
   7   3  -7        995.14        990.70       206.04 o
   8   3  -7       4767.85       4877.95       381.17 o
   9   3  -7        638.90        638.72       252.40 o
  10   3  -7        336.05        305.62       250.68 o
   0   4  -7      12209.08      11706.40      1215.63 o
   1   4  -7       5689.13       5458.29       176.85 o
   2   4  -7       1924.06       1907.57      1916.16 o
   4   4  -7       7462.87       7542.72      1534.98 o
   5   4  -7       6084.77       6078.13       101.30 o
   6   4  -7        703.84        721.13      1193.30 o
   7   4  -7        150.52        159.68       145.94 o
   8   4  -7       1788.79       1778.80      1294.61 o
   9   4  -7       2474.30       2408.93       247.25 o
  10   4  -7        150.35        137.36      1301.47 o
   0   5  -7       1777.82       1735.87      6210.33 o
   1   5  -7       6555.92       6323.66        91.00 o
   2   5  -7       8835.33       8657.04      1104.02 o
   4   5  -7        834.55        882.53      3729.29 o
   5   5  -7       3628.34       3674.35       106.45 o
   6   5  -7       2965.53       3049.37       355.42 o
   7   5  -7       2614.58       2621.84       314.21 o
   8   5  -7         80.30         92.72      2287.02 o
   9   5  -7       1027.40       1004.44       226.64 o
   0   6  -7       3803.22       3500.93       219.77 o
   1   6  -7        168.79        151.09       164.83 o
   2   6  -7       2823.95       2925.74       152.81 o
   3   6  -7         46.02         46.36       180.28 o
   4   6  -7       2166.47       2098.16       178.57 o
   5   6  -7        523.47        513.38       149.38 o
   6   6  -7        957.98       1037.06       109.89 o
   7   6  -7        136.67        147.66       197.45 o
   8   6  -7        411.52        388.04       182.00 o
   9   6  -7        320.87        312.49       300.47 o
   0   7  -7        487.04        504.79      1299.76 o
   1   7  -7       5169.32       4946.63        77.26 o
   2   7  -7       3829.72       3846.05       188.87 o
   3   7  -7       7419.94       8476.75       106.45 o
   4   7  -7        283.13        317.64       726.28 o
   5   7  -7       1492.29       1531.55       135.64 o
   6   7  -7       1529.28       1586.49       139.08 o
   7   7  -7       4387.69       4438.41       145.94 o
   8   7  -7         89.14         97.87       442.98 o
   0   8  -7       1870.66       1759.91      1703.25 o
   1   8  -7        203.40        211.19        91.00 o
   2   8  -7        481.82        461.87       116.75 o
   4   8  -7       1171.13       1179.57      1059.38 o
   5   8  -7        182.27        197.45       130.49 o
   6   8  -7        191.33        195.74       111.60 o
   7   8  -7        148.33        137.36       169.98 o
   0   9  -7       2231.05       3306.91       159.68 o
   1   9  -7       1524.87       1402.78       211.19 o
   3   9  -7       1345.80       1352.98       192.30 o
   4   9  -7       1433.20       1471.46       109.89 o
   5   9  -7        924.57        885.96       154.53 o
   6   9  -7          6.04          8.58       166.55 o
   0  10  -7       1415.62       1354.70       219.77 o
   1  10  -7         54.47         53.23       183.72 o
   2  10  -7       1179.25       1128.06       209.47 o
   3  10  -7        298.98        300.47       176.85 o
   4  10  -7        966.14       1004.44       154.53 o
   0   0  -6      81906.02      77374.21       120.19 o
   2   0  -6       9401.56       9170.42       887.68 o
   4   0  -6      46514.03      46617.86        66.96 o
   6   0  -6       1972.73       2034.63       242.09 o
  10   0  -6        290.22        262.70       279.87 o
   0   1  -6      45839.12      54012.91      2278.44 o
   1   1  -6       1176.75       1165.83        22.32 o
   2   1  -6      32474.81      32045.81       415.51 o
   3   1  -6       1814.28       1789.10        30.91 o
   4   1  -6      28116.56      28275.31      1401.06 o
   5   1  -6       2862.77       2869.08        70.40 o
   6   1  -6      15413.03      15785.96       142.51 o
   7   1  -6       2233.42       2214.91       180.28 o
   8   1  -6       7509.03       7444.85      1205.32 o
   9   1  -6       1572.61       1516.10       224.93 o
  10   1  -6       4055.20       3822.01       197.45 o
  11   1  -6        729.55        681.64       321.08 o
   1   2  -6       3863.49       3729.29        36.06 o
   2   2  -6      11496.09      11629.14        60.09 o
   3   2  -6       3172.78       3188.44        49.79 o
   4   2  -6      18360.21      18742.61      4172.27 o
   5   2  -6       2180.58       2165.12        63.53 o
   6   2  -6       5029.61       5322.65       113.32 o
   7   2  -6       1155.06       1196.74        75.55 o
   8   2  -6       5636.03       5660.90      1972.82 o
   9   2  -6        670.25        621.55       163.11 o
  10   2  -6       1164.74       1145.23       214.62 o
  11   2  -6        200.22        185.43       372.59 o
   0   3  -6      29631.02      27925.04        80.70 o
   2   3  -6      13301.05      13222.50       630.13 o
   3   3  -6       3333.24       3250.25       104.74 o
   4   3  -6      19093.08      17271.15        46.36 o
   5   3  -6       3773.20       3902.71        92.72 o
   6   3  -6       6305.67       6481.62       168.26 o
   7   3  -6        822.46        800.11       144.23 o
   8   3  -6       5714.10       5624.84       267.85 o
   9   3  -6       1274.89       1234.51       188.87 o
  10   3  -6       1655.98       1553.87       420.66 o
  11   3  -6         98.58         84.13       467.02 o
   0   4  -6      28879.53      32080.15       741.74 o
   1   4  -6       7119.23       6806.13       118.47 o
   2   4  -6      12055.56      12154.54      1797.68 o
   3   4  -6       5217.42       5068.54       145.94 o
   4   4  -6      17909.50      31393.35       619.83 o
   5   4  -6       4381.56       4412.65        60.09 o
   6   4  -6       6747.12       6996.71       841.32 o
   7   4  -6       1799.21       1754.76       132.21 o
   8   4  -6       4819.12       4709.69       597.51 o
   9   4  -6       1366.17       1334.10       207.76 o
  10   4  -6       2151.23       2043.21       829.30 o
   0   5  -6      12888.45      12341.69     20227.80 o
   1   5  -6       1626.04       1601.95       115.04 o
   2   5  -6       7581.77       7685.22      4483.05 o
   3   5  -6       1759.71       1756.48       101.30 o
   4   5  -6       8199.52       8296.47      9130.92 o
   5   5  -6       2877.12       2942.91        72.11 o
   6   5  -6       3301.58       3511.23      2728.29 o
   7   5  -6       1930.94       1989.99       111.60 o
   8   5  -6       2302.19       2307.63      6138.22 o
   9   5  -6       1536.45       1534.98       221.49 o
  10   5  -6        763.05        757.19      2233.80 o
   0   6  -6       2495.92       2386.61       204.32 o
   1   6  -6        468.97        432.68       657.61 o
   2   6  -6      32890.77      32190.04        49.79 o
   3   6  -6       1852.34      18933.19       224.93 o
   4   6  -6       1904.73       1917.87       120.19 o
   5   6  -6        137.04        151.09       291.89 o
   6   6  -6      12979.00      13328.95        82.42 o
   7   6  -6       1587.49       1564.17       214.62 o
   8   6  -6        998.92        973.53       137.36 o
   9   6  -6        147.55        152.81       758.91 o
   0   7  -6       1419.07       1356.42        94.43 o
   1   7  -6        116.00        106.45        97.87 o
   3   7  -6          4.42          5.15       125.34 o
   4   7  -6       1195.88       1191.59       127.06 o
   5   7  -6        261.95        233.51       173.42 o
   6   7  -6       1441.14       1529.83       133.92 o
   7   7  -6         32.82         20.60       130.49 o
   8   7  -6        659.14        635.28       140.79 o
   9   7  -6        149.07        127.06       618.11 o
   1   8  -6        178.00        164.83       104.74 o
   2   8  -6       9456.90       9821.15      1019.89 o
   3   8  -6        202.16        200.89       236.94 o
   4   8  -6       4597.36      21427.97       166.55 o
   5   8  -6         83.44         82.42        97.87 o
   6   8  -6       4607.94       4776.65       513.38 o
   7   8  -6        123.11        120.19       157.96 o
   1   9  -6       1096.54       1025.04       211.19 o
   2   9  -6       2780.37       2929.18       159.68 o
   3   9  -6       1050.79        990.70       183.72 o
   4   9  -6        616.35        631.85       106.45 o
   5   9  -6        586.80        611.25       121.91 o
   6   9  -6       1302.52       1395.91       147.66 o
   7   9  -6        481.71        444.70       161.40 o
   1  10  -6        330.49        310.77       147.66 o
   2  10  -6       3198.71       3231.37      1447.42 o
   3  10  -6        108.38        104.74       145.94 o
   4  10  -6        367.94        379.45       118.47 o
   5  10  -6        404.72        415.51       149.38 o
   0  11  -6          2.00          1.72      8155.68 o
   1  11  -6        715.82        669.62       154.53 o
   2  11  -6       4114.90       4057.24      1234.51 o
   1   0  -5       9529.89       9362.72        75.55 o
   3   0  -5      27309.63      27021.91       566.61 o
   7   0  -5      19247.58      19132.37       276.43 o
   9   0  -5       1142.51       1073.12       796.68 o
   0   1  -5      46265.52      44327.40      1540.14 o
   2   1  -5      45623.83      44962.68        85.85 o
   3   1  -5      13932.51      13914.45        39.49 o
   4   1  -5      24888.75      25411.38       667.91 o
   5   1  -5       1453.14       1447.42       137.36 o
   6   1  -5      14012.04      14633.86        97.87 o
   7   1  -5       7391.31       7429.39        94.43 o
   8   1  -5       4837.37       5005.01       546.00 o
   9   1  -5         83.60         73.83       230.08 o
  10   1  -5       1721.07       1715.27       185.43 o
  11   1  -5       1685.05       1545.29       317.64 o
   1   2  -5      18492.55      17789.68        49.79 o
   2   2  -5       1094.03       1104.02     11105.46 o
   3   2  -5       9298.32       9357.57        48.08 o
   4   2  -5      12479.86      12544.29      2369.44 o
   5   2  -5      13656.80      13625.99        49.79 o
   6   2  -5        283.25        298.76      5645.45 o
   7   2  -5       2362.57       2438.12        77.26 o
   8   2  -5       2960.61       2942.91      1162.40 o
   9   2  -5       4294.64       4069.25       159.68 o
  10   2  -5         67.81         63.53      2278.44 o
  11   2  -5        424.98        374.30       343.40 o
   0   3  -5       2966.52       2960.08       199.17 o
   1   3  -5       3634.80       3523.25       115.04 o
   2   3  -5      12548.12      12180.29       106.45 o
   3   3  -5       3421.67       3428.82       346.83 o
   4   3  -5       2474.00       2546.29       166.55 o
   5   3  -5       1701.23       1729.00        94.43 o
   6   3  -5       4378.20       4465.88        82.42 o
   7   3  -5       1432.85       1476.61       245.53 o
   8   3  -5       1204.80       1188.15       194.02 o
   9   3  -5        442.29        430.96       194.02 o
  10   3  -5        753.34        717.70       405.21 o
  11   3  -5        293.56        267.85       516.81 o
   0   4  -5      25616.69      24415.53       425.81 o
   1   4  -5       2450.97       2424.38        48.08 o
   2   4  -5       1379.38       1454.29       168.26 o
   3   4  -5       5103.26       5118.33        80.70 o
   4   4  -5      15169.89      15258.85       242.09 o
   5   4  -5        408.14        449.85        97.87 o
   6   4  -5        279.54        319.36       211.19 o
   7   4  -5       3235.03       3353.27       132.21 o
   8   4  -5       3543.84       3519.82       187.15 o
   9   4  -5         66.46         80.70       243.81 o
  10   4  -5          2.13          3.43       691.94 o
   0   5  -5      25849.39      24784.68      3437.40 o
   1   5  -5       5857.96       5674.64        42.92 o
   2   5  -5      23434.30      23153.54       238.66 o
   3   5  -5       9458.15       9259.70        68.68 o
   4   5  -5      15022.31      15265.71      1316.93 o
   5   5  -5       1286.78       1337.53        61.81 o
   6   5  -5       7935.20       8238.09       164.83 o
   7   5  -5       5696.79       5693.52       200.89 o
   8   5  -5       3433.95       3470.03       612.96 o
   9   5  -5        134.72        135.64       492.77 o
  10   5  -5       1078.72       1049.08       599.23 o
   0   6  -5      12688.55      12077.27       187.15 o
   1   6  -5       3337.09       3185.01        56.66 o
   2   6  -5       4743.62       4599.80       127.06 o
   4   6  -5       7313.03       7386.47       109.89 o
   5   6  -5       4100.21       4168.84       125.34 o
   6   6  -5       1387.81       1440.55        94.43 o
   7   6  -5       1125.92       1152.10       161.40 o
   8   6  -5       1483.87       1504.08       180.28 o
   9   6  -5       1907.36       1844.04       618.11 o
  10   6  -5        144.88        149.38       635.28 o
   0   7  -5       3952.24       3669.20      1092.00 o
   1   7  -5       4041.15       3792.82        80.70 o
   2   7  -5       5052.31       4836.75      1450.85 o
   4   7  -5       2331.42       2307.63       633.57 o
   5   7  -5       3200.63       3215.91       159.68 o
   6   7  -5       1870.58       1881.82       594.08 o
   7   7  -5       1213.78       1231.08       164.83 o
   8   7  -5        514.08        515.10       303.91 o
   9   7  -5       1168.87       1109.17       209.47 o
   0   8  -5       1480.89       1385.61      8430.40 o
   1   8  -5       2243.26       2189.16       178.57 o
   2   8  -5        929.56        927.17      2661.33 o
   3   8  -5       1297.04       1332.38        97.87 o
   4   8  -5       1030.29       1025.04      4211.76 o
   5   8  -5       1665.53       1744.46       183.72 o
   6   8  -5        396.15        400.06      2257.84 o
   7   8  -5        360.27        370.87       133.92 o
   8   8  -5        369.15        369.15      2493.06 o
   0   9  -5        376.28        365.72       183.72 o
   1   9  -5       1745.97       1608.81       257.55 o
   2   9  -5        475.78        458.43       297.04 o
   3   9  -5       1972.61       1931.61       194.02 o
   4   9  -5        253.49        264.42       120.19 o
   5   9  -5        796.80        784.66       223.21 o
   6   9  -5        180.78        178.57       214.62 o
   7   9  -5       1066.03       1064.53       204.32 o
   1  10  -5        388.79        374.30       154.53 o
   2  10  -5         96.74        104.74       216.34 o
   3  10  -5        102.32         92.72       127.06 o
   4  10  -5       3396.16       3442.55       132.21 o
   5  10  -5        525.04        559.74       187.15 o
   6  10  -5          8.32         12.02       166.55 o
   0  11  -5        567.58        508.23       324.51 o
   1  11  -5        190.44        190.59       157.96 o
   2  11  -5        651.38        678.21      2055.23 o
   3  11  -5         27.10         30.91       204.32 o
   4  11  -5        377.98        365.72       329.66 o
   0   0  -4      10872.67      10360.29       444.70 o
   2   0  -4        675.43        583.77      2594.36 o
   4   0  -4       6652.47       6734.02       194.02 o
   6   0  -4        599.50        530.55       846.47 o
   8   0  -4       1988.27       2005.44       297.04 o
  10   0  -4        299.69        247.25       461.87 o
   1   1  -4       2083.32       2038.06        25.75 o
   2   1  -4     157228.70     156391.58     10305.34 o
   3   1  -4       5320.65       5211.05        34.34 o
   4   1  -4      38456.57      38669.93        91.00 o
   5   1  -4        113.03        118.47        87.57 o
   6   1  -4      58199.14      60223.25      3214.20 o
   7   1  -4       3180.85       3142.08       127.06 o
   8   1  -4      11440.35      11309.78       157.96 o
   9   1  -4         40.69         39.49       195.74 o
  10   1  -4      10626.21      10140.51      2194.31 o
  11   1  -4        734.80        679.93       314.21 o
   0   2  -4      67133.79      63904.46      4474.46 o
   1   2  -4      10506.30      10238.38        37.77 o
   2   2  -4      51579.39      51523.28     12851.63 o
   3   2  -4       5350.09       5317.50        32.62 o
   4   2  -4      39090.04      39415.11      1972.82 o
   5   2  -4       8751.41       8918.02        94.43 o
   6   2  -4      19991.70      20811.57      6304.77 o
   7   2  -4       1766.06       1766.78       108.17 o
   8   2  -4      10154.89      10192.02       930.61 o
   9   2  -4       3216.33       3104.31       183.72 o
  10   2  -4       4282.19       4120.76      3471.74 o
  11   2  -4        402.11        357.13       333.10 o
   0   3  -4      30270.97      28766.37        87.57 o
   1   3  -4       7435.95       7255.98       159.68 o
   2   3  -4      39470.97      39069.99       513.38 o
   3   3  -4       2113.31       2190.87        60.09 o
   4   3  -4      18751.90      18807.85        87.57 o
   5   3  -4       8827.38       8952.36       142.51 o
   6   3  -4      15896.45      16299.34       216.34 o
   7   3  -4        900.24        963.23       113.32 o
   8   3  -4       5422.24       5379.31       113.32 o
   9   3  -4       3483.87       3384.18       247.25 o
  10   3  -4       3323.08       3121.48       386.32 o
  11   3  -4        258.67        255.83       379.45 o
   0   4  -4       3419.28       3475.18      1038.78 o
   2   4  -4      26799.69      26307.64      4201.46 o
   3   4  -4       6785.97       6747.75        75.55 o
   4   4  -4       2535.98       2661.33       489.34 o
   5   4  -4       8002.04       8095.58        77.26 o
   6   4  -4       9603.59       9882.96      2388.33 o
   7   4  -4       3311.60       3396.20       168.26 o
   8   4  -4       1185.10       1165.83       315.93 o
   9   4  -4       3221.56       3164.40       406.93 o
  10   4  -4       1553.62       1488.63      2082.70 o
   0   5  -4      37974.31      27392.78      4653.03 o
   1   5  -4       2194.78       2091.29       104.74 o
   2   5  -4       5244.03       5274.58      5865.22 o
   3   5  -4       3136.04      11531.27       200.89 o
   4   5  -4      24146.05      24248.98      2211.48 o
   5   5  -4        799.79        803.55       279.87 o
   6   5  -4       2346.67       2432.97      2410.65 o
   7   5  -4       1686.49       1600.23       116.75 o
   8   5  -4       6995.54       7032.77      1148.66 o
   9   5  -4        220.78        202.60       458.43 o
  10   5  -4        640.15        594.08      2110.17 o
   0   6  -4      41813.35      35994.87       400.06 o
   1   6  -4       3542.81       3370.44       127.06 o
   3   6  -4       1883.08      18931.48       367.43 o
   4   6  -4      26952.55      44097.32       137.36 o
   5   6  -4       2781.79       2956.65        92.72 o
   6   6  -4      23476.70      24154.54       235.23 o
   7   6  -4        511.94        473.89       267.85 o
   8   6  -4       8085.24       8061.24       137.36 o
   9   6  -4        955.31        975.25       206.04 o
  10   6  -4       5858.14       5511.52       678.21 o
   0   7  -4       7445.93       7343.54       199.17 o
   1   7  -4        212.62        202.60       254.11 o
   2   7  -4        384.42        357.13       157.96 o
   3   7  -4        649.32        643.87       327.94 o
   4   7  -4       4630.37       4812.71       133.92 o
   5   7  -4        772.92        774.36       139.08 o
   6   7  -4         93.59         77.26       125.34 o
   7   7  -4        845.22        846.47       202.60 o
   8   7  -4       1184.37       1210.47       235.23 o
   9   7  -4        519.38        494.49       216.34 o
   0   8  -4       6854.15       6627.56       664.47 o
   2   8  -4      11543.84      11488.35       187.15 o
   3   8  -4        107.52         96.15        70.40 o
   4   8  -4       4572.74       4661.61       400.06 o
   5   8  -4        639.88        664.47        82.42 o
   6   8  -4       4870.09       4932.90       224.93 o
   7   8  -4        126.16        123.62       132.21 o
   8   8  -4       1506.23       1507.51       350.26 o
   9   8  -4        319.06        315.93       425.81 o
   0   9  -4       6780.21       6684.22       195.74 o
   1   9  -4       2377.28       2264.70       252.40 o
   2   9  -4       3528.10       3576.48       530.55 o
   4   9  -4       4466.10       4771.50       104.74 o
   5   9  -4       2289.35       2324.80       178.57 o
   6   9  -4       1535.22       1600.23       324.51 o
   7   9  -4        161.31        169.98       202.60 o
   8   9  -4       1389.84       1406.21       211.19 o
   0  10  -4      10515.35       9771.36       278.15 o
   1  10  -4         55.56         51.51       276.43 o
   2  10  -4       1505.95       1545.29       334.81 o
   3  10  -4        259.01        248.96       139.08 o
   4  10  -4       6951.21       7063.68       182.00 o
   6  10  -4        945.81        956.36       159.68 o
   7  10  -4        252.06        250.68       240.38 o
   0  11  -4        474.53        479.04       844.76 o
   1  11  -4        710.65        673.06       163.11 o
   2  11  -4        922.84        918.59      1735.87 o
   3  11  -4        787.42        717.70       159.68 o
   4  11  -4        305.43        334.81       497.93 o
   5  11  -4        312.15        334.81       260.98 o
   0  12  -4        970.80        963.23       194.02 o
   1  12  -4        125.52        108.17       195.74 o
   1   0  -3       8291.34       8078.41        20.60 o
   3   0  -3       8250.65       8335.96       125.34 o
   5   0  -3       2914.77       2937.76       133.92 o
   7   0  -3       3773.73       3787.67       151.09 o
   9   0  -3        506.01        480.76       305.62 o
   0   1  -3       3125.02       3011.59       398.34 o
   2   1  -3      29459.76      28946.65      9113.76 o
   3   1  -3      19885.67      19947.93        49.79 o
   4   1  -3       2155.03       2161.68       242.09 o
   5   1  -3      16452.55      16651.32        78.98 o
   6   1  -3       8879.26       9237.38      4522.54 o
   7   1  -3       5411.70       5441.13       157.96 o
   8   1  -3       1150.12       1114.32       255.83 o
   9   1  -3       4183.64       3983.41       173.42 o
  10   1  -3       1251.37       1234.51      2675.06 o
  11   1  -3        863.31        781.23       297.04 o
   0   2  -3      10890.35      10444.42        44.64 o
   2   2  -3      13273.91      13184.73      4910.58 o
   3   2  -3       8462.95       8377.17        34.34 o
   4   2  -3       6506.56       6593.22        39.49 o
   5   2  -3       4702.59       4752.61        85.85 o
   6   2  -3       4647.87       4833.31      3250.25 o
   7   2  -3       9792.00      10051.23       123.62 o
   8   2  -3       1844.33       1849.19        89.28 o
   9   2  -3       3028.80       2978.97       166.55 o
  10   2  -3        793.76        770.93      2311.06 o
  11   2  -3       3049.21       2850.20       322.79 o
   0   3  -3      76270.59      69199.65      1509.23 o
   1   3  -3       6128.97       5928.75       144.23 o
   2   3  -3     117127.65     115317.86       442.98 o
   3   3  -3       6028.19       5860.07        46.36 o
   4   3  -3      38726.05      39215.94       693.66 o
   5   3  -3       3601.47       3674.35        91.00 o
   6   3  -3      36357.24      37684.39       199.17 o
   7   3  -3       3136.52       3088.86        87.57 o
   8   3  -3       6238.97       6373.45       348.55 o
   9   3  -3       1098.75       1064.53       403.49 o
  10   3  -3       4739.56       4622.12       357.13 o
  11   3  -3        814.69        715.98       367.43 o
   0   4  -3      16310.53      15480.33       118.47 o
   1   4  -3       3347.37       3217.63       343.40 o
   2   4  -3      12153.28      12204.33      9498.36 o
   3   4  -3       2482.10       2470.74       348.55 o
   4   4  -3       9492.48       9508.66        94.43 o
   5   4  -3       4279.46       4124.20       118.47 o
   6   4  -3       4299.03       4493.35      4766.35 o
   7   4  -3       1696.59       1699.82       254.11 o
   8   4  -3       2427.09       2391.76       154.53 o
   9   4  -3       2020.38       1892.12       480.76 o
  10   4  -3        782.77        746.89      3092.29 o
   0   5  -3      10387.70      10271.00       185.43 o
   1   5  -3        256.76        240.38        63.53 o
   2   5  -3       5063.75       4604.95      2050.08 o
   3   5  -3        115.51        106.45        99.59 o
   4   5  -3       6934.64       7130.64       147.66 o
   5   5  -3        234.17        236.94       116.75 o
   6   5  -3       2105.92       2080.99       956.36 o
   7   5  -3         56.89         48.08       154.53 o
   8   5  -3       2220.86       2180.57       175.13 o
   9   5  -3         78.52         78.98       200.89 o
  10   5  -3        496.48        482.47       880.81 o
   0   6  -3        465.39        460.15       355.42 o
   1   6  -3      10622.98      10272.72        91.00 o
   2   6  -3       3077.69       2997.86       619.83 o
   3   6  -3       8411.84       8416.66       216.34 o
   4   6  -3        304.95        317.64       285.02 o
   5   6  -3       5759.59       5961.37        87.57 o
   6   6  -3       1209.87       1224.21       300.47 o
   7   6  -3       3064.53       3152.38       156.25 o
   8   6  -3        114.36        115.04       290.17 o
   9   6  -3       1549.33       1495.49       206.04 o
  10   6  -3        210.44        197.45       788.10 o
   0   7  -3       1563.88       1416.51      4809.27 o
   1   7  -3       1629.61       1486.91       303.91 o
   2   7  -3       5302.81       5236.80      4338.82 o
   3   7  -3       2016.51       8830.45       106.45 o
   4   7  -3        724.77        691.94      2027.76 o
   5   7  -3        778.81        755.47       159.68 o
   6   7  -3       1658.23       1668.91      2630.42 o
   7   7  -3       1234.37       1224.21       187.15 o
   8   7  -3         84.21         82.42      1001.00 o
   9   7  -3        230.19        209.47       236.94 o
   2   8  -3       3090.13       3059.67       151.09 o
   3   8  -3       3668.49       3694.95       108.17 o
   4   8  -3      10594.92      10538.85       151.09 o
   5   8  -3       2161.95       2228.65        92.72 o
   6   8  -3        786.01        810.42       197.45 o
   7   8  -3       2333.07       2407.21       123.62 o
   8   8  -3       2480.59       2474.18       206.04 o
   9   8  -3        959.45        946.06       211.19 o
   0   9  -3       2399.46       2216.63       374.30 o
   2   9  -3       6166.25       6074.69      1160.68 o
   4   9  -3       1481.70       1505.80       168.26 o
   5   9  -3       1046.79        999.29       164.83 o
   6   9  -3       2556.25       2601.23       875.66 o
   8   9  -3        391.63        389.76       485.91 o
   0  10  -3       1624.62       1466.31       393.19 o
   1  10  -3        690.51        649.02       247.25 o
   2  10  -3        847.37        806.98       212.91 o
   3  10  -3        672.55        655.89       175.13 o
   4  10  -3       1071.11       1055.95       248.96 o
   5  10  -3        352.02        357.13       200.89 o
   7  10  -3        327.37        314.21       230.08 o
   0  11  -3        424.29        437.83       595.79 o
   1  11  -3        206.24        192.30       187.15 o
   2  11  -3        346.07        324.51       276.43 o
   3  11  -3        162.01        159.68       166.55 o
   4  11  -3        294.94        324.51       391.47 o
   5  11  -3        144.20        139.08       142.51 o
   0  12  -3        704.12        597.51       288.45 o
   2  12  -3        292.03        290.17      1950.49 o
   3  12  -3          7.34          5.15       216.34 o
   0   0  -2      48810.59      46966.41         5.15 o
   2   0  -2     129891.98     128761.85      1049.08 o
   4   0  -2      29899.00      30146.82       142.51 o
   6   0  -2      40782.71      42198.34       508.23 o
   8   0  -2      10659.83      10511.38       422.38 o
  10   0  -2       6455.69       6179.43       403.49 o
   0   1  -2       8232.10       7930.75        60.09 o
   1   1  -2       4971.66       4847.05        27.47 o
   2   1  -2     174408.72     173181.98      2412.36 o
   3   1  -2        929.18        958.08        84.13 o
   4   1  -2       6819.17       6878.24       163.11 o
   5   1  -2       5581.88       5676.35        97.87 o
   6   1  -2      55869.32      57785.13      1418.23 o
   7   1  -2        371.66        379.45       113.32 o
   8   1  -2       3343.41       3293.18       266.13 o
   9   1  -2       1868.92       1845.76       175.13 o
  10   1  -2       9008.63       8619.26      1045.64 o
  11   1  -2         94.84         94.43       309.06 o
   0   2  -2     320434.56     254980.86       310.77 o
   1   2  -2       8822.66       8650.17        36.06 o
   2   2  -2      19213.01      18790.68        32.62 o
   3   2  -2       6574.78       6557.17        84.13 o
   4   2  -2     169873.75     172074.52       192.30 o
   5   2  -2       6523.04       6624.13        92.72 o
   6   2  -2      10285.48      10274.44        96.15 o
   7   2  -2       3111.70       3140.37       109.89 o
   8   2  -2      37747.75      38122.22       125.34 o
   9   2  -2       2421.91       2316.21       334.81 o
  10   2  -2       3895.65       3549.01       429.25 o
  11   2  -2        795.32        719.42       322.79 o
   0   3  -2      62639.30      59727.04      1675.78 o
   1   3  -2       9618.29       9376.45        36.06 o
   2   3  -2      47041.77      46851.37      2077.55 o
   3   3  -2      28506.45      28076.14        44.64 o
   4   3  -2      37171.56      37547.03      1512.66 o
   5   3  -2         47.27         54.94        42.92 o
   6   3  -2      17692.36      18196.61      1018.17 o
   7   3  -2      18292.59      18509.10        80.70 o
   8   3  -2      10167.28      10252.12       793.25 o
   9   3  -2        354.60        364.00       315.93 o
  10   3  -2       3527.72       3300.05       837.89 o
  11   3  -2       4552.58       4161.97       360.57 o
   0   4  -2      30305.67      34303.64      1807.99 o
   2   4  -2     100117.45      98805.62      5113.18 o
   3   4  -2       4271.96       4246.10       204.32 o
   4   4  -2      17586.45      18002.59      1352.98 o
   5   4  -2      12443.42      12705.69        99.59 o
   6   4  -2      36267.80      37474.91      2457.01 o
   7   4  -2        800.04        832.74       175.13 o
   8   4  -2       4713.15       4814.43       657.61 o
   9   4  -2       4465.40       4431.54       367.43 o
  10   4  -2       6441.30       6198.32      1643.15 o
  11   4  -2        185.20        176.85       451.57 o
   0   5  -2      45127.36      43177.02       891.12 o
   1   5  -2       7388.39       7020.75       127.06 o
   2   5  -2      37689.84      37196.76        73.83 o
   3   5  -2       4494.12       4541.43        78.98 o
   4   5  -2      29608.11      29861.80       362.28 o
   5   5  -2       5286.32       5150.96       115.04 o
   6   5  -2      15347.91      15734.45       101.30 o
   7   5  -2       1629.88       1699.82       121.91 o
   8   5  -2       9456.16       9417.66       283.30 o
   9   5  -2       1619.91       1531.55       236.94 o
  10   5  -2       3308.72       3111.18       467.02 o
   0   6  -2      19098.95      18296.19       169.98 o
   1   6  -2       1478.96       1430.25        53.23 o
   2   6  -2      16820.94      16618.70      2573.76 o
   3   6  -2        335.24        317.64       190.59 o
   4   6  -2      11923.92      12089.29        73.83 o
   5   6  -2       1880.25       2010.59        65.25 o
   6   6  -2       8107.47       8294.75      1349.55 o
   7   6  -2         88.63         99.59       135.64 o
   8   6  -2       3402.78       3428.82       171.70 o
   9   6  -2        797.24        808.70       463.59 o
  10   6  -2       2108.06       1981.40      1452.57 o
   0   7  -2      54181.92      56986.73      5530.41 o
   1   7  -2       1060.82       1011.30       164.83 o
   2   7  -2       1424.80       1413.08      3978.25 o
   3   7  -2        948.71        946.06       133.92 o
   4   7  -2      33798.02      18704.83      3725.86 o
   5   7  -2       1549.37       1593.36       142.51 o
   6   7  -2       1117.69       1110.89      2390.04 o
   7   7  -2        825.15        834.45       137.36 o
   8   7  -2       9085.43       9093.15      1969.38 o
   9   7  -2        788.81        769.21       255.83 o
   0   8  -2      22835.65      21764.50       355.42 o
   1   8  -2        404.36        400.06       115.04 o
   2   8  -2      10058.19      10224.65       226.64 o
   3   8  -2       1957.17       1945.34       199.17 o
   4   8  -2      14233.86      14384.90       209.47 o
   5   8  -2         90.85         92.72       178.57 o
   6   8  -2       4841.72       4956.94       224.93 o
   7   8  -2       1764.63       1763.34       240.38 o
   8   8  -2       3740.74       3787.67       228.36 o
   9   8  -2        156.64        151.09       257.55 o
   0   9  -2       3826.36       3816.86      2170.27 o
   2   9  -2      19192.57      18873.10      3420.23 o
   3   9  -2        661.59        628.42        82.42 o
   4   9  -2       2787.99       2958.37      1576.19 o
   5   9  -2        614.91        657.61       127.06 o
   6   9  -2       8081.03       8178.00      1746.17 o
   7   9  -2        497.04        475.60       194.02 o
   8   9  -2       1195.19       1152.10       930.61 o
   0  10  -2       8426.92       7985.70      1986.55 o
   1  10  -2       2059.92       1895.55       161.40 o
   2  10  -2        651.72        705.68       427.53 o
   3  10  -2       1108.93       1102.30        99.59 o
   4  10  -2       5511.42       5703.82      1162.40 o
   5  10  -2       1719.20       1680.93       164.83 o
   6  10  -2        469.30        487.62       398.34 o
   7  10  -2        327.92        336.53       207.76 o
   0  11  -2       2829.00       2736.87       283.30 o
   1  11  -2        775.04        736.59       200.89 o
   2  11  -2       1306.36       1308.34       350.26 o
   3  11  -2        677.57        678.21       171.70 o
   4  11  -2       1915.75       2008.87       310.77 o
   5  11  -2        444.57        432.68       185.43 o
   6  11  -2        723.15        745.17       274.72 o
   0  12  -2       2778.89       2656.18       444.70 o
   1  12  -2        307.01        285.02       240.38 o
   2  12  -2        459.01        451.57      2093.00 o
   3  12  -2        437.55        432.68       169.98 o
   1   0  -1      16642.24      16213.49        36.06 o
   3   0  -1      16951.04      17020.47        65.25 o
   5   0  -1      12033.71      12123.63        77.26 o
   7   0  -1       9626.35       9726.72       235.23 o
   9   0  -1       4363.63       4222.07       214.62 o
   0   1  -1        929.44        892.83        20.60 o
   1   1  -1      28635.64      27901.01        30.91 o
   2   1  -1      71250.77      70396.38        94.43 o
   3   1  -1       6311.14       6309.92       168.26 o
   4   1  -1        177.11        197.45        96.15 o
   5   1  -1      24744.99      18342.55       113.32 o
   6   1  -1      19360.33      20195.18       104.74 o
   7   1  -1        258.69        245.53       163.11 o
   8   1  -1        288.15        262.70       199.17 o
   9   1  -1       8899.47       8571.19       228.36 o
  10   1  -1       2565.18       2529.12       276.43 o
  11   1  -1          4.30          5.15       360.57 o
   0   2  -1        646.15        614.68        54.94 o
   1   2  -1       5324.65       5205.90        41.21 o
   2   2  -1      54083.93      53734.76       281.59 o
   3   2  -1       7834.02       7733.30       192.30 o
   4   2  -1         61.25         66.96        46.36 o
   5   2  -1       1323.28       1337.53       106.45 o
   6   2  -1      16379.41      16999.87       214.62 o
   7   2  -1       3492.65       3526.69       218.06 o
   8   2  -1         67.15         56.66        97.87 o
   9   2  -1        294.21        279.87       355.42 o
  10   2  -1       2339.07       2261.27       403.49 o
  11   2  -1        618.17        566.61       436.11 o
   0   3  -1      28642.43      20624.42     11625.70 o
   1   3  -1       3069.55       2934.33        51.51 o
   2   3  -1      15124.09      14824.45      6105.60 o
   3   3  -1       1186.11       1169.27        39.49 o
   4   3  -1      16886.18      16996.44      7554.73 o
   5   3  -1       2687.35       2716.27        49.79 o
   6   3  -1       5677.16       5863.50      3234.80 o
   7   3  -1        228.47        245.53        84.13 o
   8   3  -1       5055.69       4967.24      4048.65 o
   9   3  -1       1023.91        982.12       238.66 o
  10   3  -1       1195.40       1148.66      2080.99 o
  11   3  -1         28.64         29.19       355.42 o
   0   4  -1       5723.12       5679.79      1431.97 o
   1   4  -1       2427.05       2335.10       106.45 o
   2   4  -1      64634.25      64263.31        91.00 o
   3   4  -1        583.80        585.49        85.85 o
   4   4  -1       2759.63       2913.72       719.42 o
   5   4  -1       3738.55       3713.84       125.34 o
   6   4  -1      21740.35      22507.96        94.43 o
   7   4  -1        569.24        583.77       113.32 o
   8   4  -1        513.37        527.11       520.25 o
   9   4  -1       1608.14       1553.87       207.76 o
  10   4  -1       3174.00       3033.91       384.60 o
  11   4  -1        191.87        187.15       396.62 o
   0   5  -1      11843.95      11198.18        94.43 o
   1   5  -1       2634.78       2606.38       242.09 o
   2   5  -1      25153.71      24738.32      1919.59 o
   3   5  -1        912.18        963.23       218.06 o
   4   5  -1       6050.95       6078.13        46.36 o
   5   5  -1       3085.43       3118.04       231.79 o
   6   5  -1       8357.84       8631.28       738.30 o
   7   5  -1        610.89        621.55       173.42 o
   8   5  -1       1018.42       1023.32       161.40 o
   9   5  -1       1227.09       1203.61       285.02 o
  10   5  -1       1262.65       1205.32       659.32 o
   0   6  -1       6921.56       6461.01      4477.90 o
   1   6  -1       5608.61       5336.39       106.45 o
   2   6  -1       5434.82       5468.60      1167.55 o
   3   6  -1       6070.78      16213.49        75.55 o
   4   6  -1       3990.46       3950.78      2805.55 o
   5   6  -1       4014.37       4055.52        70.40 o
   6   6  -1       1868.36       1909.29       791.53 o
   7   6  -1       3466.30       3471.74       139.08 o
   8   6  -1        938.28        937.47      1390.76 o
   9   6  -1       1702.75       1608.81       202.60 o
  10   6  -1        314.39        276.43       516.81 o
   0   7  -1       2934.56       2699.10      1392.47 o
   1   7  -1       3604.27       3542.14       152.81 o
   2   7  -1      12363.64      12157.97       806.98 o
   3   7  -1       1340.58       1344.40        87.57 o
   4   7  -1       1656.48       1613.97      1025.04 o
   5   7  -1       3662.21       3930.18        80.70 o
   6   7  -1       4481.01       4587.78       758.91 o
   7   7  -1        329.78        334.81       152.81 o
   8   7  -1        376.65        357.13       750.32 o
   9   7  -1       1415.82       1440.55       216.34 o
  10   7  -1        658.19        652.45       518.53 o
   0   8  -1        310.92        307.34       295.32 o
   1   8  -1       2911.89       2668.19       204.32 o
   2   8  -1       1054.20       1057.66       228.36 o
   3   8  -1       3438.69       3293.18       216.34 o
   4   8  -1        170.05        178.57       178.57 o
   5   8  -1       1191.29       1155.53       200.89 o
   6   8  -1        580.44        595.79       135.64 o
   7   8  -1       1821.03       1737.59       260.98 o
   8   8  -1         30.39         30.91       238.66 o
   9   8  -1        291.88        257.55       233.51 o
  10   8  -1        173.22        166.55       266.13 o
   0   9  -1        220.99        242.09       369.15 o
   2   9  -1       5107.83       5035.92      4864.22 o
   3   9  -1        186.58        164.83        94.43 o
   4   9  -1        217.06        243.81       346.83 o
   5   9  -1        705.74        798.40       109.89 o
   6   9  -1       2122.23       2135.93      2080.99 o
   7   9  -1         65.16         61.81       398.34 o
   8   9  -1        154.47        152.81       312.49 o
   9   9  -1        275.41        300.47       228.36 o
   0  10  -1       2796.74       2590.93      2788.38 o
   1  10  -1        114.08        101.30       169.98 o
   2  10  -1       2191.27       2214.91       139.08 o
   3  10  -1        717.94        673.06       118.47 o
   4  10  -1       1747.26       1763.34      1562.46 o
   5  10  -1         26.13         30.91       128.77 o
   6  10  -1        945.79        970.10       195.74 o
   7  10  -1        709.55        674.78       192.30 o
   0  11  -1       1444.03       1316.93       173.42 o
   1  11  -1         67.07         58.38       233.51 o
   2  11  -1       1521.91       1452.57       180.28 o
   3  11  -1        311.22        312.49       140.79 o
   4  11  -1        941.53        942.62       192.30 o
   5  11  -1        118.85        106.45       233.51 o
   6  11  -1        718.51        690.23       238.66 o
   0  12  -1        810.84        731.44       303.91 o
   2  12  -1        241.98        254.11       211.19 o
   3  12  -1         42.26         34.34       169.98 o
   4  12  -1        493.35        489.34       238.66 o
   2   0   0       8904.42       8916.30       151.09 o
   4   0   0     594188.56     601657.31     89439.47 o
   6   0   0      11200.63      11174.14       142.51 o
   8   0   0     119945.96     121164.20     24753.77 o
  10   0   0       7027.08       6388.90       293.60 o
   2   1   0      11820.22      11778.52      1368.44 o
   3   1   0      19440.02      19092.87       283.30 o
   4   1   0      18907.74      19140.95        41.21 o
   5   1   0       2336.50       2266.42        46.36 o
   6   1   0       5829.08       6031.77       676.49 o
   7   1   0      14767.05      14604.67       202.60 o
   8   1   0       3726.96       3746.46       118.47 o
   9   1   0       2273.71       2213.19       171.70 o
  10   1   0       1849.82       1770.21       496.21 o
  11   1   0       3811.10       3499.22       339.96 o
   0   2   0      34949.50      33975.70       348.55 o
   2   2   0      91738.42      90162.32        25.75 o
   3   2   0       5139.31       5157.82        30.91 o
   4   2   0      21266.10      21453.73       169.98 o
   5   2   0       5946.48       6095.30       103.02 o
   6   2   0      30192.31      31180.45        63.53 o
   7   2   0       1178.81       1191.59        82.42 o
   8   2   0       7146.10       6898.85       140.79 o
   9   2   0       1445.63       1402.78       171.70 o
  10   2   0       5008.16       4824.73       283.30 o
  11   2   0        210.06        182.00       319.36 o
   0   3   0      57822.29      55173.59       164.83 o
   1   3   0      20701.78      20090.44        63.53 o
   2   3   0      58374.17      58521.71      4752.61 o
   3   3   0      16626.97      16781.81        24.04 o
   4   3   0      33819.72      22011.75        73.83 o
   5   3   0       8807.52       8869.94        56.66 o
   6   3   0      22551.05      23512.39      1605.38 o
   7   3   0       6165.07       6358.00        89.28 o
   8   3   0       9567.07       9518.96       211.19 o
   9   3   0       1618.58       1555.59       180.28 o
  10   3   0       4864.90       4668.48       777.79 o
  11   3   0       1354.03       1217.34       346.83 o
   0   4   0     165651.25     157638.09       633.57 o
   1   4   0       4935.81       4792.10        73.83 o
   2   4   0      23654.97      23519.26        30.91 o
   3   4   0       4917.24       4862.50        75.55 o
   4   4   0      94040.30      60333.14       285.02 o
   5   4   0       1794.85       1825.16       173.42 o
   6   4   0      13670.04      14026.05       116.75 o
   7   4   0       1951.51       1976.25       152.81 o
   8   4   0      22190.08      22197.18       238.66 o
   9   4   0        302.34        288.45       254.11 o
  10   4   0       4615.86       4369.73       367.43 o
  11   4   0        425.31        388.04       437.83 o
   0   5   0     125861.96     109401.13        49.79 o
   1   5   0       5756.58       5461.73       111.60 o
   2   5   0       4562.63       4678.78       152.81 o
   3   5   0      21001.10      17379.32       125.34 o
   4   5   0      74816.61      58095.91        42.92 o
   5   5   0         56.48         72.11        87.57 o
   6   5   0       3089.39       3178.14       187.15 o
   7   5   0      15190.72      15600.53       123.62 o
   8   5   0      18736.62      18749.48       321.08 o
   9   5   0        567.38        638.72       436.11 o
  10   5   0       1274.01       1170.98       293.60 o
   0   6   0      22533.32      21189.31     10854.78 o
   3   6   0        437.82        420.66        63.53 o
   4   6   0      11774.21      11824.88      7304.05 o
   5   6   0       3595.44       3545.57        96.15 o
   6   6   0      12142.11      12784.67        96.15 o
   7   6   0       1384.93       1373.59       327.94 o
   8   6   0       1717.55       1780.51      5504.65 o
   9   6   0       1924.60       1804.55       231.79 o
  10   6   0       1408.05       1421.66       230.08 o
   0   7   0      25399.08      24106.47        89.28 o
   2   7   0      73087.12      73353.04       104.74 o
   3   7   0        362.71        405.21        94.43 o
   4   7   0      18841.62      18728.87        65.25 o
   5   7   0       1830.57       1759.91        72.11 o
   6   7   0      29384.99      30215.50       133.92 o
   7   7   0         12.42         22.32       144.23 o
   8   7   0       7842.36       7595.94       187.15 o
   9   7   0        767.83        702.25       211.19 o
  10   7   0       5669.65       5425.67       250.68 o
   0   8   0       5994.81       5439.41       345.11 o
   1   8   0       2599.67       2487.91       207.76 o
   3   8   0       2148.62       2178.85       161.40 o
   4   8   0       4098.14       3991.99       190.59 o
   5   8   0       1413.15       1443.98       152.81 o
   6   8   0       4072.33       4395.48        92.72 o
   7   8   0        911.49        920.30       195.74 o
   8   8   0       1449.11       1456.00       245.53 o
   9   8   0        361.27        348.55       212.91 o
  10   8   0       1007.02        971.81       252.40 o
   0   9   0       9150.81       8490.49       176.85 o
   1   9   0        223.01        214.62       240.38 o
   2   9   0       4536.16       4620.41       212.91 o
   3   9   0        110.80        115.04       109.89 o
   4   9   0       6181.31       6230.94       111.60 o
   5   9   0        171.10        175.13       109.89 o
   6   9   0       2225.73       2295.61       321.08 o
   7   9   0         30.27         30.91       175.13 o
   8   9   0       2068.54       1989.99       183.72 o
   9   9   0         47.16         46.36       231.79 o
   0  10   0        133.01        130.49      1986.55 o
   1  10   0       1617.28       1528.12       238.66 o
   2  10   0       3162.26       3330.95       223.21 o
   3  10   0       2797.98       2802.12       154.53 o
   4  10   0        158.56        168.26      1256.83 o
   5  10   0        319.67        314.21       128.77 o
   6  10   0       1208.40       1291.17       200.89 o
   7  10   0       1843.22       1869.80       204.32 o
   8  10   0        152.01        156.25       879.10 o
   1  11   0          0.62          1.72       381.17 o
   3  11   0         99.03         96.15       386.32 o
   4  11   0         13.82         13.74       130.49 o
   5  11   0         64.46         85.85       628.42 o
   6  11   0       6040.34       6158.83       218.06 o
   0  12   0       3910.86       3626.27       348.55 o
   2  12   0       1671.47       1710.12       206.04 o
   3  12   0        308.55        297.04       163.11 o
   4  12   0       2734.60       2769.50       233.51 o
   1   0   1      17572.87      17118.34        24.04 o
   3   0   1      15301.14      15372.17        66.96 o
   5   0   1      13789.45      13917.88        89.28 o
   7   0   1       8397.80       8485.34       228.36 o
   9   0   1       5022.79       4864.22       223.21 o
   0   1   1        730.96        728.00        58.38 o
   2   1   1      71994.59      71181.05        82.42 o
   3   1   1       6300.66       6303.05       149.38 o
   4   1   1        262.31        283.30        48.08 o
   5   1   1      24770.25      25229.38       115.04 o
   6   1   1      19662.54      20516.25       108.17 o
   7   1   1        285.66        274.72       163.11 o
   8   1   1        524.19        489.34       200.89 o
   9   1   1       8913.16       8583.21       168.26 o
  10   1   1       2654.89       2614.97       293.60 o
   0   2   1        994.32        959.79        36.06 o
   1   2   1       5287.16       5173.28        36.06 o
   2   2   1      55705.36      55321.25       396.62 o
   3   2   1       7904.16       7803.70       175.13 o
   4   2   1        195.18        209.47        39.49 o
   5   2   1       1141.18       1162.40       106.45 o
   6   2   1      17079.73      17719.29       212.91 o
   7   2   1       3454.84       3492.35       218.06 o
   8   2   1         53.98         46.36       103.02 o
   9   2   1        213.52        204.32       211.19 o
  10   2   1       2509.37       2424.38       420.66 o
  11   2   1        593.98        546.00       437.83 o
   0   3   1      24546.04      27013.33     14834.75 o
   1   3   1       2945.91       2819.29        36.06 o
   2   3   1      12947.93      12685.08      6109.03 o
   3   3   1       1021.04        995.85        41.21 o
   4   3   1      14253.00      14350.56      8190.02 o
   5   3   1       2618.53       2661.33        61.81 o
   6   3   1       4876.79       5030.77      3236.52 o
   7   3   1        144.63        151.09        97.87 o
   8   3   1       4116.48       4040.07      5149.24 o
   9   3   1        979.34        946.06       173.42 o
  10   3   1       1040.37        995.85      2072.40 o
  11   3   1         12.51         12.02       346.83 o
   0   4   1       3724.08       3748.18      1423.38 o
   1   4   1       2385.29       2297.33        77.26 o
   2   4   1      62910.46      62597.84        87.57 o
   3   4   1        747.17        746.89        87.57 o
   4   4   1       1526.06       1651.74       920.30 o
   5   4   1       3635.32       3607.39       121.91 o
   6   4   1      21013.80      21769.65       111.60 o
   7   4   1        731.73        746.89       121.91 o
   8   4   1        166.50        176.85       513.38 o
   9   4   1       1573.86       1517.81       207.76 o
  10   4   1       3024.86       2893.12       194.02 o
  11   4   1        249.13        238.66       384.60 o
   0   5   1      11802.49      11155.25        51.51 o
   1   5   1       2583.30       2560.02       221.49 o
   2   5   1      27388.04      26932.62      1510.95 o
   3   5   1        689.16        736.59       214.62 o
   4   5   1       6181.06       6201.75        39.49 o
   5   5   1       3110.38       3154.10       295.32 o
   6   5   1       9282.06       9579.06       733.15 o
   7   5   1        432.80        439.55       233.51 o
   8   5   1       1189.82       1188.15       175.13 o
   9   5   1       1231.80       1212.19       285.02 o
  10   5   1       1432.44       1365.00       345.11 o
   0   6   1       7774.87       7271.43      7170.13 o
   1   6   1       5680.19       5393.05        94.43 o
   2   6   1       5612.51       5642.01      1165.83 o
   3   6   1       5312.09       5171.56        53.23 o
   4   6   1       4534.71       4495.07      2805.55 o
   5   6   1       4556.12       4594.65        73.83 o
   6   6   1       2020.30       2058.67      1001.00 o
   7   6   1       2846.65       2850.20       152.81 o
   8   6   1       1077.09       1073.12      1382.17 o
   9   6   1       1967.16       1859.49       211.19 o
  10   6   1        382.91        339.96       516.81 o
   0   7   1       2786.82       2570.33      2196.02 o
   1   7   1       3716.09       3645.16       149.38 o
   2   7   1      11972.53      11792.25      1016.46 o
   3   7   1       1632.55       1643.15       101.30 o
   4   7   1       1591.89       1553.87      1023.32 o
   5   7   1       3652.88       3911.29       104.74 o
   6   7   1       4343.54       4455.58       752.04 o
   7   7   1        519.97        532.27       157.96 o
   8   7   1        389.69        369.15       743.45 o
   9   7   1       1422.41       1443.98       216.34 o
  10   7   1        645.28        640.44       523.68 o
   0   8   1        304.60        302.19       396.62 o
   1   8   1       2980.57       2742.02       279.87 o
   2   8   1       1354.96       1356.42       128.77 o
   3   8   1       3563.11       3401.35       211.19 o
   4   8   1        168.66        176.85       199.17 o
   5   8   1       1177.65       1165.83       149.38 o
   6   8   1        726.39        745.17       360.57 o
   7   8   1       1878.79       1782.23       254.11 o
   8   8   1         31.32         32.62       235.23 o
   9   8   1        277.63        254.11       235.23 o
  10   8   1        207.95        200.89       279.87 o
   1   9   1        579.47        575.19       200.89 o
   2   9   1       4772.00       4716.56      7819.15 o
   3   9   1        146.77        127.06       109.89 o
   4   9   1         70.30         85.85       381.17 o
   5   9   1        664.76        755.47       106.45 o
   6   9   1       1963.69       1981.40      2647.59 o
   7   9   1         34.27         30.91       388.04 o
   8   9   1         74.25         73.83       310.77 o
   9   9   1        258.57        283.30       226.64 o
   0  10   1       2228.08       2065.53      2814.14 o
   1  10   1         87.32         75.55       199.17 o
   2  10   1       2085.56       2111.89       200.89 o
   4  10   1       1374.67       1387.32      1555.59 o
   5  10   1         42.34         42.92       169.98 o
   6  10   1        891.49        915.15       185.43 o
   7  10   1        678.04        647.30       190.59 o
   0  11   1       1363.18       1243.10       315.93 o
   1  11   1         63.95         54.94       242.09 o
   2  11   1       1857.53       1778.80       226.64 o
   3  11   1        271.95        276.43       157.96 o
   4  11   1        897.81        897.98       176.85 o
   5  11   1        140.13        127.06       214.62 o
   6  11   1        871.06        843.04       230.08 o
   0  12   1        890.24        803.55       300.47 o
   2  12   1        262.88        278.15       298.76 o
   3  12   1         28.78         22.32       176.85 o
   4  12   1        544.66        540.85       252.40 o
   0   0   2      53209.49      51214.23         5.15 o
   2   0   2     144433.16     143121.00      1047.36 o
   4   0   2      32867.36      33192.75       183.72 o
   6   0   2      46589.75      48164.86       509.94 o
   8   0   2      11829.13      11702.97       260.98 o
   1   1   2       4824.95       4702.82        44.64 o
   2   1   2     171989.05     170781.62      2606.38 o
   3   1   2        641.99        667.91        72.11 o
   4   1   2       7668.38       7738.45       144.23 o
   5   1   2       5693.50       5789.67       103.02 o
   6   1   2      54803.54      56682.82      1418.23 o
   7   1   2        263.22        267.85       135.64 o
   8   1   2       3622.47       3576.48       223.21 o
   9   1   2       1927.92       1904.14       185.43 o
  10   1   2       8731.32       8353.13      1050.79 o
   1   2   2       8399.39       8244.96        68.68 o
   2   2   2      21691.14      21300.92        39.49 o
   3   2   2       7397.72       7365.87       106.45 o
   4   2   2     161068.44     163099.84       171.70 o
   5   2   2       5606.48       5703.82       109.89 o
   6   2   2      10123.83      10167.99       109.89 o
   7   2   2       3822.66       3858.07        96.15 o
   8   2   2      35333.84      35670.36       142.51 o
   9   2   2       2016.54       1931.61       235.23 o
  10   2   2       3349.09       3047.65       418.94 o
   1   3   2       9942.21       9692.38        44.64 o
   2   3   2      52660.32      52400.66      2075.83 o
   3   3   2      29035.45      28603.25        48.08 o
   4   3   2      35723.90      48111.64      1643.15 o
   5   3   2        136.26        144.23        61.81 o
   6   3   2      19832.81      20406.37      1133.21 o
   7   3   2      18634.76      18861.08        94.43 o
   8   3   2       9985.13      10068.40      1009.59 o
   9   3   2        366.90        374.30       327.94 o
  10   3   2       3886.28       3643.44       492.77 o
   1   4   2      13115.89      12703.97       106.45 o
   2   4   2     101040.80      99629.77      5102.88 o
   3   4   2       4792.35       4786.95       197.45 o
   4   4   2      24074.57      33177.30      2159.97 o
   5   4   2      11971.53      12199.18       108.17 o
   6   4   2      37164.31      38340.27      2733.44 o
   7   4   2       1221.32       1277.44       223.21 o
   8   4   2       6538.74       6679.07       832.74 o
   9   4   2       4206.64       4167.12       362.28 o
  10   4   2       6813.21       6533.13       978.68 o
   1   5   2       7332.11       6965.81        80.70 o
   2   5   2      35385.03      34892.57        70.40 o
   3   5   2       3948.36       4000.58        80.70 o
   4   5   2      28963.19      29233.38       357.13 o
   5   5   2       5637.78      14084.43       204.32 o
   6   5   2      14353.64      14693.96        91.00 o
   7   5   2       1278.95       1342.68       166.55 o
   8   5   2       9092.79       9063.96       271.28 o
   9   5   2       1811.81       1715.27       264.42 o
  10   5   2       3118.24       2925.74       406.93 o
   1   6   2       1339.11       1294.61        68.68 o
   2   6   2      14951.82      14769.51      2561.74 o
   3   6   2        396.04        391.47       103.02 o
   4   6   2      10279.54      10432.40        66.96 o
   5   6   2       1721.58       1842.32        66.96 o
   6   6   2       6983.63       7144.38      1708.40 o
   7   6   2        183.18        200.89       173.42 o
   8   6   2       2894.19       2915.44       194.02 o
   9   6   2        744.62        757.19       400.06 o
  10   6   2       1770.43       1662.04       808.70 o
   1   7   2       1174.43       1121.19       188.87 o
   2   7   2       1240.48       1213.91      3969.67 o
   3   7   2        837.43        837.89       178.57 o
   4   7   2      36259.27      36633.59      3159.25 o
   5   7   2       1720.36       1773.65       188.87 o
   6   7   2       1111.10       1098.87      2379.74 o
   7   7   2        691.16        702.25       176.85 o
   8   7   2       9843.59       9850.34      1952.21 o
   9   7   2        856.79        837.89       250.68 o
  10   7   2        597.15        546.00      1129.78 o
   1   8   2        466.56        460.15       199.17 o
   2   8   2       9190.64       9306.06       279.87 o
   3   8   2       1952.52       1933.33       163.11 o
   4   8   2      16181.44       4355.99       185.43 o
   5   8   2        188.31        195.74       125.34 o
   6   8   2       4592.61       4677.07       216.34 o
   7   8   2       1756.12       1747.89       226.64 o
   8   8   2       4313.72       4368.01       224.93 o
   9   8   2        204.36        197.45       260.98 o
   1   9   2        533.00        515.10       142.51 o
   2   9   2      17634.72      17271.15      3425.39 o
   3   9   2        786.96        755.47       123.62 o
   4   9   2       3076.47       3284.59      1567.61 o
   5   9   2        478.66        515.10       173.42 o
   6   9   2       7419.81       7484.34      1735.87 o
   7   9   2        618.26        600.94       166.55 o
   8   9   2       1177.99       1146.95       920.30 o
   0  10   2       8101.83       7693.81      2003.72 o
   1  10   2       2030.32       1866.36       199.17 o
   2  10   2        385.65        415.51       233.51 o
   4  10   2       5270.91       5465.16      1155.53 o
   5  10   2       1653.25       1610.53       209.47 o
   6  10   2        323.74        334.81       382.89 o
   7  10   2        370.75        382.89       194.02 o
   1  11   2        784.36        746.89       252.40 o
   3  11   2        676.77        679.93       238.66 o
   4  11   2       2175.73       2278.44       425.81 o
   5  11   2        456.87        442.98       228.36 o
   6  11   2        836.73        858.49       257.55 o
   0  12   2       3070.47       2934.33       461.87 o
   1  12   2        306.22        283.30       278.15 o
   2  12   2        369.75        362.28      2024.33 o
   3  12   2        460.16        456.72       190.59 o
   3   0   3       8160.76       8243.25        99.59 o
   5   0   3       3166.70       3203.89       140.79 o
   7   0   3       3621.78       3638.29       192.30 o
   9   0   3        668.85        638.72       240.38 o
   0   1   3       2941.66       2838.18       394.91 o
   2   1   3      25791.41      25328.96      7688.66 o
   3   1   3      19921.46      19983.99        27.47 o
   4   1   3       2014.49       2022.61       242.09 o
   5   1   3      16001.87      16194.60        84.13 o
   6   1   3       7498.12       7805.41      4520.82 o
   7   1   3       5531.87       5559.60        91.00 o
   8   1   3       1025.41        992.42       187.15 o
   9   1   3       4019.54       3828.88       123.62 o
   1   2   3         29.04         25.75        46.36 o
   2   2   3      14285.04      14199.47      6270.43 o
   3   2   3       7989.59       7910.15        34.34 o
   4   2   3       5056.03       5120.05        42.92 o
   5   2   3       4873.53       4920.88        94.43 o
   6   2   3       5073.37       5281.45      3075.12 o
   7   2   3       9379.77       9634.00        73.83 o
   8   2   3       1396.33       1394.19       104.74 o
   9   2   3       3093.92       3037.35       200.89 o
  10   2   3        885.99        861.93      1804.55 o
   0   3   3      68726.34      65461.77      1909.29 o
   2   3   3     124861.58     122941.27       647.30 o
   3   3   3       6604.26       6423.24        39.49 o
   4   3   3      34430.27      34885.70      1224.21 o
   5   3   3       3098.91       3174.71       113.32 o
   6   3   3      39596.08      41008.47       226.64 o
   7   3   3       3562.87       3518.10       149.38 o
   8   3   3       5418.81       5540.71       444.70 o
   9   3   3        866.62        844.76       360.57 o
  10   3   3       5380.81       5233.37       218.06 o
   1   4   3       3636.98       3485.48       240.38 o
   2   4   3      11196.60      11235.95      9470.89 o
   3   4   3       2013.34       2015.74       333.10 o
   4   4   3      10775.54      10817.00       104.74 o
   5   4   3       4834.27      14970.39       164.83 o
   6   4   3       4145.54       4318.22      5303.77 o
   7   4   3       1275.57       1275.72       317.64 o
   8   4   3       2716.25       2687.08       216.34 o
   9   4   3       2240.17       2105.02       424.10 o
  10   4   3        850.25        805.27      1874.95 o
   2   5   3       3636.83       3262.27      2032.91 o
   3   5   3        133.81        123.62        91.00 o
   4   5   3       6167.03       6354.56       218.06 o
   5   5   3        243.80        245.53        92.72 o
   6   5   3       1462.60       1435.40      1203.61 o
   7   5   3         61.00         53.23       207.76 o
   8   5   3       1925.02       1892.12       248.96 o
   9   5   3         84.88         85.85       228.36 o
  10   5   3        339.52        331.38       451.57 o
   1   6   3      10586.88      10250.40        42.92 o
   2   6   3       2757.56       2692.23       283.30 o
   3   6   3       8227.01       8401.21        96.15 o
   4   6   3        122.88        133.92       351.98 o
   5   6   3       5871.86       6095.30        70.40 o
   6   6   3       1052.06       1067.96       369.15 o
   7   6   3       2888.62       2972.10       211.19 o
   8   6   3         45.63         46.36       279.87 o
   9   6   3       1629.93       1579.63       200.89 o
  10   6   3        178.84        168.26       353.70 o
  11   6   3        539.66        492.77       283.30 o
   1   7   3       1604.95       1466.31       212.91 o
   2   7   3       5188.59       5101.16      3413.37 o
   3   7   3       1827.33       1778.80        94.43 o
   4   7   3        805.75        774.36      1988.27 o
   5   7   3        859.41        837.89       159.68 o
   6   7   3       1627.49       1627.70      2616.69 o
   7   7   3       1081.28       1073.12       221.49 o
   8   7   3        112.93        111.60       975.25 o
   9   7   3        278.60        255.83       242.09 o
  10   7   3        181.97        163.11      1184.72 o
   1   8   3       3145.05       2978.97       128.77 o
   2   8   3       3280.10       3246.82       159.68 o
   3   8   3       3155.71       3162.69        96.15 o
   4   8   3       9829.56       9785.10       125.34 o
   5   8   3       2633.78       2721.42       121.91 o
   6   8   3        871.58        896.27       185.43 o
   7   8   3       1903.32       1957.36       147.66 o
   8   8   3       2261.04       2257.84       190.59 o
   9   8   3       1188.43       1170.98       207.76 o
   1   9   3        206.19        166.55       161.40 o
   2   9   3       6748.35       6646.45      1157.25 o
   4   9   3       1282.86       1303.19       209.47 o
   6   9   3       2819.64       2867.36       702.25 o
   7   9   3        531.95        527.11       422.38 o
   8   9   3        346.67        345.11       461.87 o
   0  10   3       1919.38       3277.72       393.19 o
   1  10   3        696.23        657.61       195.74 o
   2  10   3        905.03        865.36       226.64 o
   3  10   3        675.80        654.17       216.34 o
   4  10   3       1274.38       1256.83       321.08 o
   5  10   3        353.03        365.72       266.13 o
   7  10   3        327.64        310.77       206.04 o
   0  11   3        285.25        293.60       595.79 o
   1  11   3        230.99        216.34       207.76 o
   2  11   3        332.50        326.23       364.00 o
   3  11   3        161.64        157.96       187.15 o
   4  11   3        197.79        216.34       535.70 o
   5  11   3        173.96        171.70       192.30 o
   0  12   3        556.99        470.45       309.06 o
   1  12   3         43.25         34.34       236.94 o
   2  12   3        269.61        267.85      1890.40 o
   3  12   3         12.75         10.30       271.28 o
   0   0   4       9996.10       9512.10       425.81 o
   2   0   4         27.49         15.45      1881.82 o
   4   0   4       6148.50       6206.90       248.96 o
   6   0   4        111.09         89.28       848.19 o
   8   0   4       1860.27       1862.93       226.64 o
   0   1   4      73551.02      78862.84       310.77 o
   1   1   4       2252.16       2204.61        34.34 o
   2   1   4     147443.19     146642.53      6043.79 o
   3   1   4       5703.63       5592.22        27.47 o
   4   1   4      44983.44      45292.34        97.87 o
   5   1   4        103.04        109.89       104.74 o
   6   1   4      54416.82      56287.92      3571.33 o
   7   1   4       3440.12       3401.35       109.89 o
   9   1   4         28.66         27.47       132.21 o
  10   1   4      10043.54       9573.91      1723.85 o
   2   2   4      50499.13      50376.34     15834.04 o
   3   2   4       6004.06       5964.81        32.62 o
   4   2   4      41993.43      42363.17      2110.17 o
   5   2   4       8051.81       8215.77        87.57 o
   6   2   4      19803.04      20578.06      5971.67 o
   7   2   4       2303.99       2312.78        89.28 o
   8   2   4      10748.47      10792.97       856.78 o
   9   2   4       2866.67       2771.21       226.64 o
  10   2   4       4371.67       4196.31      2724.85 o
   2   3   4      36983.93      36635.31       594.08 o
   3   3   4       1509.25       1576.19        99.59 o
   4   3   4      20704.47      31070.56       125.34 o
   5   3   4       8935.81       5638.58       169.98 o
   6   3   4      14975.70      15372.17       219.77 o
   7   3   4        583.95        630.13       188.87 o
   8   3   4       5837.83       5787.96       178.57 o
   9   3   4       3547.63       3449.42       245.53 o
  10   3   4       3212.41       3023.61       228.36 o
   0   4   4       2898.04       2942.91      1304.91 o
   2   4   4      27133.75      26772.95      3554.16 o
   3   4   4       7734.93       7690.38       104.74 o
   4   4   4       2328.51       2417.51       776.08 o
   5   4   4       6873.53       6946.92        78.98 o
   6   4   4       9582.09       9934.47      3372.16 o
   7   4   4       4222.42       4323.37       240.38 o
   8   4   4       1234.11       1198.46       400.06 o
  10   4   4       1494.61       1449.14      1565.89 o
   0   5   4      37697.88      35684.10      5899.56 o
   1   5   4       2413.88       2300.76        72.11 o
   2   5   4       6767.83       6778.66      3612.54 o
   3   5   4       3171.54       2994.42        53.23 o
   4   5   4      24011.28      32672.51      3255.40 o
   5   5   4        986.53        985.55        84.13 o
   6   5   4       2940.00       3052.80      3047.65 o
   7   5   4       1633.04       1557.31       161.40 o
   8   5   4       7004.19       7029.34      1443.98 o
  10   5   4        728.65        683.36      1543.57 o
  11   5   4        362.79        314.21       264.42 o
   0   6   4      43663.02      41231.68       357.13 o
   1   6   4       3583.54       3403.06       137.36 o
   2   6   4      48085.59      47833.48       285.02 o
   3   6   4       2058.01       1983.12       188.87 o
   4   6   4      28113.85      17829.17       168.26 o
   5   6   4       2685.27       2843.33       115.04 o
   6   6   4      22724.08      23337.26       279.87 o
   7   6   4        626.17        594.08       314.21 o
   8   6   4       8387.08       8377.17       190.59 o
   9   6   4        895.82        911.72       226.64 o
  10   6   4       5708.54       5358.71       309.06 o
   1   7   4        217.41        207.76       223.21 o
   2   7   4        161.24        168.26       145.94 o
   3   7   4        828.23        824.15       115.04 o
   4   7   4       4164.55       4328.52       144.23 o
   5   7   4        703.43        702.25       168.26 o
   6   7   4         11.72         10.30       216.34 o
   7   7   4       1006.19       1009.59       238.66 o
   8   7   4       1033.24       1054.23       231.79 o
   9   7   4        489.81        465.30       216.34 o
  10   7   4         19.85         17.17       338.25 o
   1   8   4        338.42        321.08       163.11 o
   2   8   4      13175.96      13179.58       163.11 o
   3   8   4        113.03        101.30        84.13 o
   4   8   4       3783.73       3837.46       430.96 o
   5   8   4        586.12        612.96       108.17 o
   6   8   4       5489.46       5602.52       195.74 o
   7   8   4        142.81        140.79       145.94 o
   8   8   4       1357.59       1342.68       331.38 o
   9   8   4        294.61        291.89       223.21 o
   1   9   4       2275.65       2166.83       180.28 o
   2   9   4       4162.43       4234.08       382.89 o
   4   9   4       4386.14       4663.33       156.25 o
   5   9   4       2191.24       2221.78       331.38 o
   6   9   4       1783.68       1862.93       262.70 o
   7   9   4        149.95        159.68       204.32 o
   8   9   4       1390.25       1399.34       183.72 o
   0  10   4      10001.98       9295.76       248.96 o
   1  10   4         51.77         46.36       214.62 o
   2  10   4       1838.17       1871.51       221.49 o
   4  10   4       6622.03      11883.25       211.19 o
   6  10   4       1087.76       1097.15       199.17 o
   7  10   4        289.24        288.45       199.17 o
   0  11   4        565.01        561.45       849.91 o
   1  11   4        753.05        714.27       242.09 o
   2  11   4        865.93        867.08      1758.19 o
   3  11   4        814.77        746.89       183.72 o
   4  11   4        364.29        396.62       762.34 o
   5  11   4        341.76        362.28       211.19 o
   0  12   4        847.39        860.21       224.93 o
   1  12   4        118.97        103.02       271.28 o
   3   0   5      25692.59      25416.53       295.32 o
   5   0   5       3296.58       3263.99      1409.64 o
   7   0   5      17895.32      17784.53       204.32 o
   9   0   5       1868.90       1758.19       624.98 o
   0   1   5      44840.69      42933.21      1062.81 o
   2   1   5      48486.10      47794.00        49.79 o
   3   1   5      13861.72      13844.05        29.19 o
   4   1   5      24110.18      24599.24       848.19 o
   5   1   5       1625.91       1620.83       176.85 o
   6   1   5      15169.17      15830.60       121.91 o
   7   1   5       7260.07       7297.19        97.87 o
   8   1   5       4715.81       4874.52       418.94 o
   9   1   5        189.88        175.13       173.42 o
  10   1   5       1951.44       1936.76       214.62 o
   2   2   5        558.80        571.76     11120.91 o
   3   2   5       9186.19       9254.55        42.92 o
   4   2   5      13217.96      13292.90      2237.23 o
   5   2   5      13944.16      31092.88        44.64 o
   6   2   5        127.13        135.64      3779.08 o
   7   2   5       2235.65       2314.50        96.15 o
   8   2   5       3132.34       3114.61      1224.21 o
   9   2   5       4430.10       4199.75       171.70 o
  10   2   5         68.42         63.53      1768.49 o
   2   3   5      10508.25      10169.70       116.75 o
   3   3   5       3188.68       3191.88       415.51 o
   4   3   5       1711.45       1770.21       291.89 o
   5   3   5       1834.68       1869.80       115.04 o
   6   3   5       3456.08       3516.39       139.08 o
   7   3   5       1271.45       1306.63       348.55 o
   8   3   5        880.72        865.36       218.06 o
   9   3   5        514.11        513.38       209.47 o
  10   3   5        534.03        508.23       212.91 o
   0   4   5      24628.05      23484.92       523.68 o
   2   4   5       1381.96       1457.72       211.19 o
   3   4   5       4809.30       4831.60        53.23 o
   4   4   5      14512.07      14602.96       333.10 o
   5   4   5        207.56        233.51       163.11 o
   6   4   5        285.96        329.66       278.15 o
   7   4   5       3060.33       3181.57       188.87 o
   8   4   5       3315.94       3293.18       278.15 o
   9   4   5         23.75         32.62       228.36 o
  10   4   5          8.82         10.30       406.93 o
  11   4   5        760.28        721.13       264.42 o
   0   5   5      24224.64      18057.53      4368.01 o
   1   5   5       5678.28       5502.94        46.36 o
   2   5   5      26493.54      26159.98       185.43 o
   3   5   5       9357.31       9168.70        65.25 o
   4   5   5      14084.81      14300.77      2099.87 o
   5   5   5       1150.86       1196.74       106.45 o
   6   5   5       9235.50       9570.47       216.34 o
   7   5   5       5668.24       5672.92       147.66 o
   8   5   5       3273.56       3301.76       762.34 o
   9   5   5         91.08         91.00       207.76 o
  10   5   5       1331.58       1289.46       260.98 o
   0   6   5      13392.16      12733.16       202.60 o
   1   6   5       3739.32       3571.33        58.38 o
   2   6   5       4327.60       4201.46       151.09 o
   3   6   5       1529.62       1564.17        58.38 o
   4   6   5       7758.37       7824.30       156.25 o
   5   6   5       4717.93       4809.27       145.94 o
   6   6   5       1234.03       1284.30       168.26 o
   7   6   5        836.64        853.34       183.72 o
   8   6   5       1605.54       1624.27       212.91 o
   9   6   5       2166.18       2098.16       250.68 o
  10   6   5        124.12        128.77       247.25 o
   0   7   5       3894.07       3593.65      1371.87 o
   2   7   5       4973.51       4752.61      1804.55 o
   3   7   5       3139.96       3142.08        66.96 o
   4   7   5       2278.01       2244.10       685.08 o
   5   7   5       2883.61       2881.10       139.08 o
   6   7   5       1817.05       1825.16       867.08 o
   7   7   5       1536.69       1555.59       183.72 o
   8   7   5        480.06        480.76       439.55 o
   9   7   5        999.16        940.91       243.81 o
   0   8   5       1767.45       1656.89     10743.17 o
   1   8   5       2133.93       2087.85       147.66 o
   2   8   5        997.02        995.85      4283.88 o
   3   8   5       1237.38       1267.14       147.66 o
   4   8   5       1232.04       1227.64      5228.22 o
   5   8   5       1589.10       1670.63       142.51 o
   6   8   5        435.21        439.55      2235.51 o
   7   8   5        349.86        353.70       144.23 o
   8   8   5        445.75        446.42      3123.20 o
   1   9   5       1660.72       1531.55       175.13 o
   2   9   5        362.05        351.98       286.74 o
   3   9   5       1979.34       1947.06       168.26 o
   4   9   5        208.43        218.06       163.11 o
   5   9   5        697.28        681.64       183.72 o
   7   9   5       1096.62       1102.30       254.11 o
   2  10   5        196.83        195.74       166.55 o
   3  10   5        151.56        142.51       135.64 o
   4  10   5       3076.48       3124.91       139.08 o
   5  10   5        512.87        549.44       221.49 o
   6  10   5         38.40         37.77       209.47 o
   0  11   5        533.27        472.17       315.93 o
   1  11   5        183.79        183.72       132.21 o
   2  11   5        728.29        752.04      1473.17 o
   4  11   5        358.72        341.68       321.08 o
   0   0   6      72657.34      68574.66       169.98 o
   2   0   6      12087.58      11840.33       887.68 o
   4   0   6      40622.74      40680.53       101.30 o
   6   0   6       2892.86       2992.70       310.77 o
  10   0   6        344.06        317.64       194.02 o
   0   1   6      48278.40      40905.45      2269.85 o
   1   1   6       1017.74       1009.59        22.32 o
   2   1   6      31149.18      30718.58       202.60 o
   3   1   6       1487.13       1459.44        37.77 o
   4   1   6      29713.17      29906.45      1780.51 o
   5   1   6       2836.79       2845.04        94.43 o
   6   1   6      14885.84      15222.79       144.23 o
   7   1   6       2012.62       1991.70        96.15 o
   8   1   6       7971.00       7923.89       940.91 o
   9   1   6       1563.71       1509.23       142.51 o
  10   1   6       3989.27       3749.90       147.66 o
   0   2   6      29347.37      31834.62     10655.61 o
   1   2   6       3778.80       3648.59        34.34 o
   2   2   6      14314.98      14482.77        68.68 o
   3   2   6       3312.31       3324.08        49.79 o
   4   2   6      19120.15      19484.35      5997.43 o
   5   2   6       2000.54      19154.68        54.94 o
   6   2   6       6450.82       6807.85       125.34 o
   7   2   6       1286.84       1327.23       121.91 o
   8   2   6       5953.62       5973.39      2084.42 o
   9   2   6        592.99        547.72       194.02 o
  10   2   6       1515.89       1481.76       224.93 o
   1   3   6       5909.00       5769.07       152.81 o
   2   3   6      12319.46      12192.31       860.21 o
   4   3   6      18972.37      30922.90       108.17 o
   5   3   6       4155.20       4301.05       187.15 o
   6   3   6       5842.71       5980.26       274.72 o
   7   3   6        850.48        827.59       245.53 o
   8   3   6       5653.75       5575.05       159.68 o
   9   3   6       1428.20       1413.08       204.32 o
  10   3   6       1544.68       1443.98       230.08 o
  11   3   6         98.55         84.13       269.57 o
   1   4   6       7074.13       6768.35        63.53 o
   2   4   6      10779.08      10832.46      2151.38 o
   3   4   6       5465.72       5305.48       120.19 o
   4   4   6      16103.30      15890.70      1088.57 o
   5   4   6       4149.78       4189.44        97.87 o
   6   4   6       6048.31       6248.11      1497.21 o
   7   4   6       1996.04       1948.78       194.02 o
   8   4   6       4210.34       4119.05       717.70 o
   9   4   6       1249.58       1225.93       199.17 o
  10   4   6       1956.09       1849.19       491.06 o
   0   5   6      11941.17      11417.95     25756.49 o
   1   5   6       1527.67       1505.80        53.23 o
   2   5   6       9086.14       9189.30      5030.77 o
   3   5   6       1359.14       1356.42        75.55 o
   4   5   6       7621.22       7695.53     18596.66 o
   5   5   6       3008.84       3076.84        99.59 o
   6   5   6       4004.06       4244.39      4390.33 o
   7   5   6       1649.15       1701.53       157.96 o
   8   5   6       2177.30       2173.70      9907.00 o
   9   5   6       1610.17       1607.10       209.47 o
  10   5   6        919.17        910.00      1577.91 o
   0   6   6       4618.51       4385.18       224.93 o
   1   6   6        435.27        398.34       350.26 o
   2   6   6      33174.17      32517.98        68.68 o
   4   6   6       3409.38       3411.65       108.17 o
   5   6   6         50.34         58.38       394.91 o
   6   6   6      13189.62      13567.62       128.77 o
   7   6   6       1638.02       1619.12       293.60 o
   8   6   6       1544.99       1509.23       182.00 o
   9   6   6        105.53        111.60       322.79 o
   1   7   6         77.49         70.40        91.00 o
   3   7   6          3.10          0.00        82.42 o
   4   7   6        956.88        954.64        75.55 o
   5   7   6        207.24        178.57       132.21 o
   6   7   6       1302.79       1383.89       169.98 o
   7   7   6         38.53         24.04       152.81 o
   8   7   6        542.85        523.68       188.87 o
   9   7   6        122.87        101.30       226.64 o
   1   8   6        156.09        144.23        84.13 o
   2   8   6       9057.23       9374.74      1275.72 o
   5   8   6         84.99         84.13       123.62 o
   6   8   6       4390.14       4534.56       702.25 o
   7   8   6        105.77        103.02       168.26 o
   0   9   6       1175.87       1102.30       135.64 o
   1   9   6       1167.08       1093.72       132.21 o
   3   9   6       1152.66       1092.00       171.70 o
   4   9   6        845.15        865.36       125.34 o
   6   9   6       1365.65       1461.15       147.66 o
   7   9   6        543.06        506.51       209.47 o
   0  10   6        503.45        470.45       176.85 o
   1  10   6        361.19        346.83       163.11 o
   2  10   6       3462.78       3506.08      1030.19 o
   3  10   6        111.72        108.17       108.17 o
   5  10   6        434.13        446.42       169.98 o
   0  11   6         32.84         30.91      8160.83 o
   1  11   6        680.74        635.28       121.91 o
   2  11   6       3785.51       3734.44      1224.21 o
   1   0   7      30758.93      29880.69        46.36 o
   3   0   7      15605.94      15586.79       341.68 o
   5   0   7      24015.20      22729.45       437.83 o
   7   0   7       4074.90       4050.37       412.08 o
   9   0   7       7939.59       7690.38       379.45 o
   2   1   7      10381.14      10193.74       509.94 o
   4   1   7       3221.48       3368.72     11338.97 o
   5   1   7       2474.59       2493.06       161.40 o
   6   1   7       3181.81       3293.18       209.47 o
   7   1   7        666.29        666.19       139.08 o
   8   1   7        510.78        554.59      4060.67 o
   9   1   7       1466.05       1411.36       175.13 o
  10   1   7        343.66        336.53       154.53 o
   0   2   7      17657.89      16804.13     14062.11 o
   2   2   7       3264.42       3306.91      1969.38 o
   3   2   7       9661.96       9501.79        61.81 o
   4   2   7      10422.65      10514.82      8286.17 o
   5   2   7       5424.80      22549.16       130.49 o
   6   2   7        960.44       1043.93       855.06 o
   7   2   7       4278.93       4316.50       133.92 o
   8   2   7       2306.32       2333.38      3056.23 o
   9   2   7       1587.39       1464.59       199.17 o
  10   2   7         91.62         96.15       503.08 o
   0   3   7      26398.75      25476.62        73.83 o
   1   3   7       3210.80       3142.08       104.74 o
   2   3   7       3966.43       3890.69       714.27 o
   4   3   7      16965.56      17350.13        87.57 o
   5   3   7       2013.93       2115.33       250.68 o
   6   3   7       1671.88       1711.83       398.34 o
   7   3   7        868.21        856.78       345.11 o
   8   3   7       5055.61       5154.39       182.00 o
   9   3   7        645.27        659.32       293.60 o
  10   3   7        392.37        364.00       309.06 o
   1   4   7       5402.57       5188.73        65.25 o
   2   4   7       1383.86       1371.87      2142.80 o
   4   4   7       8094.74       8169.41      2422.67 o
   5   4   7       5866.77       5863.50       169.98 o
   6   4   7        505.59        515.10      1900.70 o
   7   4   7        163.57        171.70       211.19 o
   8   4   7       1972.39       1959.08      1593.36 o
   9   4   7       2396.12       2333.38       260.98 o
  10   4   7        132.49        120.19       868.79 o
   0   5   7       2065.44       2000.29      7922.17 o
   1   5   7       6675.03       6435.26        56.66 o
   2   5   7       8296.87       8119.62       946.06 o
   4   5   7        973.44       1019.89      5928.75 o
   5   5   7       3482.18       3524.97       145.94 o
   6   5   7       2701.38       2776.36       539.13 o
   7   5   7       2899.65       2910.29       151.09 o
   8   5   7         72.41         87.57      2851.91 o
   9   5   7        930.54        908.29       231.79 o
   0   6   7       3974.57       3674.35       252.40 o
   1   6   7        222.75        200.89       145.94 o
   4   6   7       2267.27       2206.33       226.64 o
   6   6   7        914.80        994.13       187.15 o
   7   6   7        110.05        120.19       273.00 o
   8   6   7        431.24        408.64       254.11 o
   9   6   7        356.80        348.55       290.17 o
   0   7   7        428.69        444.70      1639.72 o
   1   7   7       4900.32       4690.80        97.87 o
   2   7   7       3830.90       3863.22       224.93 o
   3   7   7       7244.04       7278.30        92.72 o
   4   7   7        252.36        283.30      1126.34 o
   6   7   7       1537.40       1600.23       230.08 o
   7   7   7       4335.58       4392.05       171.70 o
   8   7   7         86.18         92.72       654.17 o
   0   8   7       1824.92       1716.98      2154.82 o
   1   8   7        181.24        190.59        85.85 o
   2   8   7        514.72        492.77       101.30 o
   4   8   7       1138.25       1146.95      1650.02 o
   5   8   7        157.89        173.42       135.64 o
   6   8   7        189.15        194.02       154.53 o
   7   8   7        139.89        130.49       159.68 o
   1   9   7       1594.23       1464.59       209.47 o
   3   9   7       1486.21       1493.78       209.47 o
   6   9   7          4.33          6.87       145.94 o
   0  10   7       1628.25       1552.15       185.43 o
   1  10   7         61.62         58.38       159.68 o
   2  10   7       1143.76       1090.29       144.23 o
   2   0   8      26550.41      26357.44      2374.59 o
   4   0   8      21921.76      22119.92      1174.42 o
   6   0   8      11838.00      12202.61      1124.63 o
   8   0   8       7638.85       7618.26       616.40 o
  10   0   8       2619.51       2486.19       314.21 o
   0   1   8        994.65        887.68      3473.46 o
   2   1   8      11900.91      11615.40      3112.89 o
   4   1   8        704.52        664.47      2182.29 o
   5   1   8        482.49        491.06        75.55 o
   6   1   8       5025.56       5078.84      2027.76 o
   7   1   8       1385.87       1370.15       163.11 o
   8   1   8        324.49        309.06       789.81 o
   9   1   8         86.86         80.70       127.06 o
  10   1   8       1027.58        949.49       643.87 o
   0   2   8       7623.17       7037.92     12309.06 o
   1   2   8       1964.24       1893.83       149.38 o
   2   2   8      23835.62      23653.19      1378.74 o
   4   2   8       4207.79       4136.22      7013.88 o
   5   2   8       1284.53       1277.44       171.70 o
   6   2   8       8479.41       8840.76       662.76 o
   8   2   8        832.02        820.72      2877.67 o
   9   2   8        472.14        444.70       248.96 o
  10   2   8       1221.13       1189.87       396.62 o
   0   3   8       5611.65       5356.99        27.47 o
   1   3   8       2280.55       2213.19        37.77 o
   2   3   8      10664.34      10564.61      1102.30 o
   3   3   8       1154.88       1150.38       130.49 o
   4   3   8       3767.73       3809.99        82.42 o
   5   3   8       3960.65       3940.48        96.15 o
   6   3   8       4575.68       4704.54       558.02 o
   7   3   8       1341.87       1354.70       199.17 o
   8   3   8       1275.51       1284.30       166.55 o
   9   3   8       2029.15       1964.23       199.17 o
  10   3   8        983.50        927.17       370.87 o
   1   4   8        935.89        894.55        22.32 o
   2   4   8      14679.90      14194.32      6476.47 o
   3   4   8       1950.65       1933.33       125.34 o
   4   4   8       7619.61       7633.72      4771.50 o
   5   4   8        202.30        199.17       106.45 o
   6   4   8       6245.02       6345.98      4721.71 o
   7   4   8       1324.49       1354.70       230.08 o
   8   4   8       2463.29       2472.46      2657.89 o
   9   4   8         78.90         75.55       209.47 o
   3   5   8       1661.50       1571.04        77.26 o
   4   5   8       5603.74       5726.15       236.94 o
   6   5   8        952.69        973.53       176.85 o
   7   5   8        630.94        592.36       156.25 o
   8   5   8       1757.71       1770.21       211.19 o
   9   5   8        499.81        484.19       233.51 o
   0   6   8        531.41        384.60      1658.61 o
   1   6   8        544.43        504.79        94.43 o
   2   6   8       1064.23       1062.81       151.09 o
   3   6   8        502.46        484.19        87.57 o
   4   6   8        333.51        255.83      1253.40 o
   5   6   8        337.28        348.55       254.11 o
   6   6   8        603.31        611.25       185.43 o
   7   6   8        248.20        240.38       157.96 o
   8   6   8         93.39         70.40       726.28 o
   0   7   8       8109.23       7736.73       707.40 o
   1   7   8        297.77        278.15       182.00 o
   2   7   8       6258.69       6251.54      2511.95 o
   4   7   8       5463.98       5489.20       515.10 o
   5   7   8        269.41        278.15       274.72 o
   6   7   8       3076.82       3135.21      2242.38 o
   7   7   8        318.46        327.94       175.13 o
   0   8   8       2575.21       2498.21       128.77 o
   1   8   8        554.24        521.96       120.19 o
   2   8   8       3825.17       3706.97       221.49 o
   3   8   8        270.33        259.26       135.64 o
   6   8   8       1640.28       1629.42       187.15 o
   0   9   8       3382.40       3246.82      1924.74 o
   1   9   8        127.67        113.32       200.89 o
   2   9   8        596.10        558.02       872.23 o
   3   9   8         20.00         24.04       307.34 o
   4   9   8       2133.40       2235.51      1198.46 o
   0  10   8        858.53        789.81       506.51 o
   1  10   8        200.91        190.59       121.91 o
   2  10   8         25.55         18.89      1260.27 o
   5   0   9       4030.52       4005.73       109.89 o
   7   0   9       4050.58       3993.71       245.53 o
   9   0   9        946.02        880.81       180.28 o
   0   1   9       5747.43       5597.37       405.21 o
   1   1   9       4608.58       4464.16       176.85 o
   2   1   9        812.49        808.70      1864.65 o
   4   1   9       3726.65       3849.48       194.02 o
   5   1   9       2592.34       2633.85       144.23 o
   6   1   9        534.88        542.57      1301.47 o
   7   1   9       1861.43       1830.31       132.21 o
   9   1   9        813.38        782.95       159.68 o
   0   2   9       2801.32       2719.70        42.92 o
   2   2   9       1140.85       1121.19        61.81 o
   4   2   9       1804.61       1857.78        73.83 o
   5   2   9       3689.09       3777.37       137.36 o
   6   2   9        578.23        585.49        89.28 o
   7   2   9       2108.81       2129.06       214.62 o
   9   2   9       1423.98       1399.34       195.74 o
   0   3   9       4210.95       4055.52      2321.36 o
   2   3   9       8035.66       7796.83      5315.79 o
   3   3   9       3883.89       3813.42       194.02 o
   4   3   9       2224.79       2293.89      2273.29 o
   5   3   9       1779.94       1801.12        97.87 o
   6   3   9       2589.39       2635.57      3181.57 o
   7   3   9       1973.81       1979.68       221.49 o
   8   3   9        286.27        309.06      1097.15 o
   9   3   9        479.14        468.74       195.74 o
   1   4   9       4764.62       4537.99        77.26 o
   2   4   9        517.10        533.98       767.49 o
   3   4   9       2608.31       2616.69       147.66 o
   4   4   9       2422.91       2408.93      1459.44 o
   5   4   9       3953.40       3890.69       157.96 o
   6   4   9        300.27        319.36       750.32 o
   7   4   9        735.69        769.21       197.45 o
   8   4   9        543.99        542.57       540.85 o
   1   5   9       2139.14       2077.55       245.53 o
   2   5   9       2173.83       2101.59        39.49 o
   3   5   9       2375.76       2311.06       207.76 o
   4   5   9       1934.05       2005.44       544.28 o
   5   5   9        892.31        932.32       364.00 o
   6   5   9       1045.49       1038.78       128.77 o
   7   5   9       1215.30       1193.30       169.98 o
   8   5   9        671.81        683.36       358.85 o
   0   6   9       1093.93       1088.57       135.64 o
   1   6   9       1107.79       1076.55        56.66 o
   2   6   9        398.63        338.25      4702.82 o
   3   6   9        842.01        815.57        84.13 o
   4   6   9        727.40        760.62       161.40 o
   5   6   9        754.37        817.28       154.53 o
   6   6   9        203.87        185.43      3257.12 o
   7   6   9        332.14        309.06       169.98 o
   0   7   9       1433.99       1445.70       611.25 o
   1   7   9       2355.87       2230.36        77.26 o
   2   7   9         82.29         89.28      7269.71 o
   4   7   9        859.61        925.45       386.32 o
   5   7   9       1188.55       1201.89       154.53 o
   6   7   9          5.18          8.58      5183.58 o
   0   8   9       1215.71       1116.04      2170.27 o
   1   8   9       1711.93       1617.40       121.91 o
   2   8   9        928.89        930.61       209.47 o
   4   8   9        761.17        762.34      1437.12 o
   0   9   9         82.40         73.83      6208.62 o
   1   9   9        495.96        473.89       130.49 o
   2   9   9        849.20        848.19      2635.57 o
   4   0  10       1541.32       1533.27      2606.38 o
   6   0  10       6664.00       7041.36     21876.11 o
   8   0  10        826.76        788.10      1079.98 o
   0   1  10       3531.69       3459.72       238.66 o
   1   1  10         18.16         20.60       157.96 o
   2   1  10       2695.19       2637.29       578.62 o
   4   1  10       2086.37       2165.12       152.81 o
   5   1  10        183.71        166.55       151.09 o
   6   1  10       1008.76       1031.91       214.62 o
   7   1  10        460.49        455.00       152.81 o
   8   1  10        434.22        453.28       135.64 o
   0   2  10      11627.95      27969.69      2572.04 o
   1   2  10        296.45        293.60       336.53 o
   2   2  10       5066.69       4876.24      1792.53 o
   3   2  10        730.36        740.02       504.79 o
   4   2  10       7553.73       7415.66      1916.16 o
   5   2  10        102.50         99.59       144.23 o
   6   2  10       2228.40       2233.80       614.68 o
   7   2  10        587.91        607.81       291.89 o
   8   2  10       2262.55       2199.46       544.28 o
   0   3  10       3049.93       2956.65       339.96 o
   1   3  10       2337.56       2218.34        36.06 o
   2   3  10        715.37        728.00      2738.59 o
   4   3  10       1974.09       2022.61       377.74 o
   5   3  10       1031.37       1016.46        97.87 o
   6   3  10        360.15        377.74      1440.55 o
   7   3  10       1654.85       1672.34       190.59 o
   8   3  10        573.25        582.06       309.06 o
   0   4  10        400.32        417.23       285.02 o
   1   4  10        760.69        738.30        37.77 o
   2   4  10       4984.27       5011.88       103.02 o
   3   4  10       1103.10       1116.04        72.11 o
   4   4  10        296.26        324.51       236.94 o
   5   4  10        574.84        573.47       144.23 o
   7   4  10        837.23        870.51       144.23 o
   1   5  10        396.59        365.72       133.92 o
   2   5  10       4017.87       3955.93       216.34 o
   3   5  10        125.60        127.06       338.25 o
   4   5  10       2665.80       2644.16       182.00 o
   5   5  10        509.31        484.19       194.02 o
   6   5  10       1799.11       1849.19       302.19 o
   7   5  10         56.77         61.81       317.64 o
   0   6  10       1176.81       1093.72        94.43 o
   1   6  10         18.07         15.45        78.98 o
   2   6  10        966.96        884.25      8105.89 o
   3   6  10         11.80         15.45        96.15 o
   4   6  10        706.45        703.96       133.92 o
   5   6  10         85.12         87.57       166.55 o
   6   6  10        411.21        396.62      6084.99 o
   0   7  10       4410.55       5035.92        99.59 o
   1   7  10        212.03        188.87        56.66 o
   2   7  10        531.08        566.61      1696.38 o
   3   7  10        330.30        315.93        96.15 o
   4   7  10       2937.48       2939.48       125.34 o
   0   8  10          0.66          0.00       221.49 o
   1   8  10         34.82         30.91       260.98 o
   2   8  10        997.23       1007.87       324.51 o
   3   8  10         91.24         85.85       173.42 o
   1   0  11         44.60         37.77        63.53 o
   3   0  11        863.21        808.70        78.98 o
   5   0  11        327.36        326.23       104.74 o
   0   1  11       1675.15       1572.76       638.72 o
   1   1  11       5181.61       4982.69        39.49 o
   2   1  11       1237.67       1128.06       976.96 o
   3   1  11       4317.72       4256.41       188.87 o
   4   1  11        947.85        956.36       309.06 o
   5   1  11       3144.73       3169.55       106.45 o
   6   1  11        380.61        365.72       432.68 o
   7   1  11       1795.38       1771.93       259.26 o
   0   2  11        156.28        152.81       353.70 o
   1   2  11       1906.62       1823.44       137.36 o
   2   2  11       1151.51       1145.23      1361.57 o
   3   2  11       1543.17       1552.15       382.89 o
   4   2  11         91.25         92.72       339.96 o
   5   2  11       1192.16       1174.42       183.72 o
   6   2  11        542.27        556.30       448.13 o
   7   2  11        653.02        683.36       293.60 o
   0   3  11       1040.07        970.10      6835.32 o
   1   3  11       2252.04       2149.67        44.64 o
   2   3  11       2177.35       2242.38     17875.53 o
   3   3  11       1913.93       1862.93       104.74 o
   4   3  11        677.95        669.62      6301.33 o
   5   3  11       1336.04       1342.68       109.89 o
   6   3  11       1117.30       1181.29      8979.83 o
   0   4  11        391.21        381.17        68.68 o
   1   4  11       1252.95       1184.72        68.68 o
   2   4  11       2034.41       1971.10      1665.48 o
   3   4  11       1416.74       1371.87       176.85 o
   4   4  11        290.47        298.76       130.49 o
   5   4  11        573.13        563.17       145.94 o
   6   4  11        919.60        920.30       934.04 o
   0   5  11       1223.80       1164.12        56.66 o
   1   5  11        631.86        600.94       430.96 o
   2   5  11       1236.14       1143.51       139.08 o
   3   5  11        916.03        892.83       442.98 o
   4   5  11        686.02        698.81       133.92 o
   5   5  11        191.85        192.30       482.47 o
   1   6  11       2964.71       2841.61        58.38 o
   2   6  11        181.49        192.30       118.47 o
   3   6  11       1439.53       1474.89       135.64 o
   4   6  11        464.31        460.15       746.89 o
   0   7  11        310.70        273.00        96.15 o
   1   7  11        112.83        106.45        60.09 o
   2   7  11         94.69         78.98       169.98 o
   2   0  12       1227.34       1253.40     19558.18 o
   4   0  12       3415.08       3310.35      7046.51 o
   6   0  12        348.31        379.45      8535.13 o
   0   1  12       3056.70       2966.95       226.64 o
   2   1  12        150.50        145.94       925.46 o
   3   1  12        758.51        745.17       230.08 o
   4   1  12       1993.93       2053.51       159.68 o
   0   2  12        993.89        951.21      1124.63 o
   1   2  12        279.23        271.28        77.26 o
   2   2  12       1987.48       1969.38      1492.06 o
   3   2  12        389.04        379.45       175.13 o
   4   2  12        749.81        746.89       873.95 o
   5   2  12        118.33        120.19       164.83 o
   0   3  12        361.96        353.70      8171.13 o
   1   3  12         60.71         56.66        44.64 o
   2   3  12        357.59        346.83       796.68 o
   3   3  12        109.15        111.60        85.85 o
   4   3  12        252.33        257.55      6498.79 o
   5   3  12         14.43         10.30       116.75 o
   0   4  12        988.73        958.08       400.06 o
   1   4  12        136.48        130.49        97.87 o
   2   4  12        145.38        149.38        80.70 o
   4   4  12        607.97        628.42       472.17 o
   0   5  12       1439.44       1322.08        68.68 o
   1   5  12        465.92        437.83        48.08 o
   2   5  12        140.44        140.79       132.21 o
   3   5  12        764.99        745.17        94.43 o
   1   0  13        242.65        233.51        66.96 o
   3   0  13        203.51        200.89        80.70 o
   0   1  13       1037.92        971.81      5995.71 o
   2   1  13        145.01        133.92       637.00 o
   3   1  13       1050.45       1019.89       111.60 o
   0   2  13         90.68         89.28      1363.29 o
   1   2  13       1320.85       1260.27       369.15 o
   2   2  13       1055.14       1042.21       109.89 o
   0   3  13        244.32        228.36       382.89 o
   1   3  13        830.93        791.53        63.53 o
